# Supplementary material
Source: publisher figshare collection journal article supplement (https://diabetesjournals.figshare.com/articles/dataset/_/14226179)
Supplement: Supplementary file 1 [file 1]

**Supplementary Table S1.** Clinical characteristics of DKD patients and healthy subjects

| Characteristics                   | Non-diabetic controls | Diabetic kidney disease patients | P value |
|-----------------------------------|-----------------------|----------------------------------|---------|
| Age (yr)                          | 48.8 $\pm$ 14.1       | 50.2 $\pm$ 16.9                  | 0.985   |
| Female                            | 2 (33.3%)             | 3 (50%)                          | 0.575   |
| Duration of Diabetes (yr)         | N/A                   | 11.5 $\pm$ 9.7                   | N/A     |
| Antidiabetic agent use            | N/A                   | 6 (100%)                         | N/A     |
| Oral antidiabetic agent use       | N/A                   | 5 (83.3%)                        | N/A     |
| Insulin use                       | N/A                   | 2 (33.3%)                        | N/A     |
| HbA1c (% (mmol/mol))              | 5.5 $\pm$ 0.3 (37)    | 7.2 $\pm$ 0.8 (55)               | <0.001  |
| Systolic BP (mmHg)                | 116.8 $\pm$ 17.9      | 149.0 $\pm$ 17.2                 | 0.010   |
| Diastolic BP (mmHg)               | 67.7 $\pm$ 4.8        | 84.0 $\pm$ 10.8                  | 0.007   |
| CKD stage                         | N/A                   | A3/G3a                           | N/A     |
| UACR (mg/g)                       | 14.8 $\pm$ 7.5        | 423.5 $\pm$ 75.1                 | <0.001  |
| eGFR (mL/min/1.73m <sup>2</sup> ) | 111.9 $\pm$ 7.9       | 50.2 $\pm$ 16.5                  | <0.001  |
| Serum creatinine ( $\mu$ mol/L)   | 54.8 $\pm$ 3.7        | 120.0 $\pm$ 11.6                 | <0.001  |

Data are expressed as n (%) or mean  $\pm$  Std. Deviation. BP, blood pressure; CKD, chronic kidney disease, according to Kidney Disease: Improving Global Outcomes (KDIGO) guideline 2012, CKD stage was classified based on GFR category and albuminuria category. UACR, urea albumin/creatinine ratio; eGFR, estimated glomerular filtration rate.
