# Supplementary material
Source: publisher figshare collection journal article supplement (https://diabetesjournals.figshare.com/articles/dataset/_/14226179)
Supplement: Supplementary file 2 [file 1]

**Supplementary Table S5. Top 10 terms of GO\_BP analysis in glomeruli from diabetic mGPDH KO mice compared with WT mice.**

| ID         | Term                                         | Ontology           | Ratio_in_study | Ratio_in_pop | Pvalue_corrected |
|------------|----------------------------------------------|--------------------|----------------|--------------|------------------|
| GO:0035456 | response to interferon-beta                  | Biological Process | 13/641         | 44/28004     | 9.29E-08         |
| GO:0006954 | inflammatory response                        | Biological Process | 45/641         | 479/28004    | 9.29E-08         |
| GO:0030155 | regulation of cell adhesion                  | Biological Process | 48/641         | 645/28004    | 9.29E-08         |
| GO:0034097 | response to cytokine                         | Biological Process | 47/641         | 464/28004    | 9.29E-08         |
| GO:0051707 | response to other organism                   | Biological Process | 70/641         | 937/28004    | 9.29E-08         |
| GO:0071345 | cellular response to cytokine stimulus       | Biological Process | 31/641         | 340/28004    | 9.29E-08         |
| GO:0002684 | positive regulation of immune system process | Biological Process | 76/641         | 1071/28004   | 9.29E-08         |
| GO:0006955 | immune response                              | Biological Process | 71/641         | 1071/28004   | 9.29E-08         |
| GO:0071310 | cellular response to organic substance       | Biological Process | 72/641         | 1214/28004   | 9.29E-08         |
| GO:0006952 | defense response                             | Biological Process | 96/641         | 1218/28004   | 9.29E-08         |
