# Supplementary material
Source: publisher figshare collection journal article supplement (https://diabetesjournals.figshare.com/articles/dataset/_/14226179)
Supplement: Supplementary file 3 [file 1]

**Supplementary Table S3. Differential expressed genes in glomeruli from diabetic mGPDH KO mice compared with WT mice.**

**Up-regulated:**

| No. | Track_id            | Gene_Name     | FC(KO/WT)   | Log2FC(KO/WT) | P value     |
|-----|---------------------|---------------|-------------|---------------|-------------|
| 1   | ENSMUSG00000086503  | Xist          | 17489.3407  | 14.09418828   | 2.67E-22    |
| 2   | ENSMUSG00000030653  | Gm45837       | 1707.993731 | 10.73808696   | 1.81E-12    |
| 3   | ENSMUSG000000107928 | Gm45140       | 1169.666266 | 10.19188124   | 5.92E-11    |
| 4   | ENSMUSG00000094065  | Gm21541       | 659.6831845 | 9.36562952    | 9.62E-09    |
| 5   | ENSMUSG00000097421  | D630011A20Rik | 475.8043925 | 8.89422478    | 1.47E-07    |
| 6   | ENSMUSG00000018865  | Sult4a1       | 375.0883092 | 8.551086488   | 8.76E-07    |
| 7   | ENSMUSG000000103037 | Pcdhgb1       | 371.9948867 | 8.53913898    | 1.03E-06    |
| 8   | ENSMUSG00000093829  | Gm24798       | 309.7667352 | 8.275038416   | 3.54E-06    |
| 9   | ENSMUSG00000026834  | Acvr1c        | 259.9842141 | 8.022280217   | 1.17E-05    |
| 10  | ENSMUSG00000021403  | Serpib9b      | 252.7902081 | 7.981796771   | 1.45E-05    |
| 11  | ENSMUSG00000045551  | Fpr1          | 238.4021963 | 7.897253716   | 2.25E-05    |
| 12  | ENSMUSG00000097770  | Gm26776       | 236.1001143 | 7.88325493    | 2.25E-05    |
| 13  | ENSMUSG00000019848  | Popdc3        | 231.2081903 | 7.853048694   | 2.82E-05    |
| 14  | ENSMUSG00000087067  | Gm11532       | 228.2586479 | 7.834525709   | 2.82E-05    |
| 15  | ENSMUSG00000099241  | Gm18852       | 227.251487  | 7.828145925   | 3.57E-05    |
| 16  | ENSMUSG00000024401  | Tnf           | 188.0441546 | 7.55492765    | 9.64E-05    |
| 17  | ENSMUSG00000026390  | Marco         | 180.8501487 | 7.498650974   | 0.000125561 |
| 18  | ENSMUSG00000027913  | Crc1          | 180.8501487 | 7.498650974   | 0.000125561 |
| 19  | ENSMUSG000000112640 | AC172027.3    | 178.835827  | 7.482491977   | 0.000164799 |
| 20  | ENSMUSG000000112022 | AC157515.1    | 177.8286662 | 7.474344097   | 0.000164799 |
| 21  | ENSMUSG00000026580  | Selp          | 166.4621368 | 7.379050251   | 0.00021796  |
| 22  | ENSMUSG00000044162  | Tnfp3         | 166.4621368 | 7.379050251   | 0.00021796  |
| 23  | ENSMUSG000000113599 | AC154502.3    | 166.4621368 | 7.379050251   | 0.00021796  |
| 24  | ENSMUSG00000097590  | Gm26675       | 163.9442347 | 7.357061358   | 0.00021796  |
| 25  | ENSMUSG00000078674  | Mup18         | 159.8436513 | 7.320517634   | 0.000290613 |
| 26  | ENSMUSG00000052270  | Fpr2          | 159.2681308 | 7.315313806   | 0.000290613 |
| 27  | ENSMUSG00000078776  | 9530053A07Rik | 159.2681308 | 7.315313806   | 0.000290613 |
| 28  | ENSMUSG00000026984  | Il1f6         | 152.0741249 | 7.248630892   | 0.000390825 |
| 29  | ENSMUSG000000113673 | AC127281.1    | 149.4842827 | 7.223849993   | 0.000390825 |
| 30  | ENSMUSG00000042256  | Ptchd4        | 144.8801189 | 7.178715826   | 0.000530405 |
| 31  | ENSMUSG00000043740  | B430306N03Rik | 144.8801189 | 7.178715826   | 0.000530405 |
| 32  | ENSMUSG000000102049 | Zbed6         | 139.7723747 | 7.126935438   | 0.000726851 |
| 33  | ENSMUSG00000066682  | Pilrb2        | 137.686113  | 7.105239247   | 0.000726851 |
| 34  | ENSMUSG000000110693 | Gm45899       | 136.6789522 | 7.094647282   | 0.000726851 |
| 35  | ENSMUSG000000113555 | AC110377.1    | 130.1324067 | 7.02383647    | 0.001006409 |
| 36  | ENSMUSG00000037716  | Ccdc33        | 123.2981011 | 6.946006771   | 0.001408973 |
| 37  | ENSMUSG000000105954 | Gm42793       | 116.1040952 | 6.859275049   | 0.001408973 |
| 38  | ENSMUSG000000100287 | Gm28068       | 116.1040952 | 6.859275049   | 0.001408973 |
| 39  | ENSMUSG00000043388  | Tmem130       | 116.1040952 | 6.859275049   | 0.001408973 |
| 40  | ENSMUSG000000105868 | Gm43766       | 114.3775337 | 6.837659893   | 0.001996045 |
| 41  | ENSMUSG00000060807  | Serpina6      | 108.9100892 | 6.766993798   | 0.001996045 |
| 42  | ENSMUSG00000099980  | Gm5619        | 108.8381491 | 6.766040518   | 0.001996045 |
| 43  | ENSMUSG000000105095 | 8430422M14Rik | 108.8381491 | 6.766040518   | 0.001996045 |
| 44  | ENSMUSG000000102610 | Gm37846       | 101.7160833 | 6.668404005   | 0.002863891 |

|    |                    |               |             |             |             |
|----|--------------------|---------------|-------------|-------------|-------------|
| 45 | ENSMUSG00000048416 | Mlfl          | 101.7160833 | 6.668404005 | 0.002863891 |
| 46 | ENSMUSG00000056987 | Fam71d        | 101.7160833 | 6.668404005 | 0.002863891 |
| 47 | ENSMUSG00000030898 | Cckbr         | 101.7160833 | 6.668404005 | 0.002863891 |
| 48 | ENSMUSG00000028718 | Stil          | 101.7160833 | 6.668404005 | 0.002863891 |
| 49 | ENSMUSG00000067455 | Hist1h4j      | 95.9608785  | 6.58437446  | 0.004165659 |
| 50 | ENSMUSG00000113303 | AC124595.1    | 94.52207731 | 6.562579431 | 0.004165659 |
| 51 | ENSMUSG00000021795 | Sftpd         | 94.52207731 | 6.562579431 | 0.004165659 |
| 52 | ENSMUSG00000067813 | Xkr9          | 94.52207731 | 6.562579431 | 0.004165659 |
| 53 | ENSMUSG00000036560 | Lgi4          | 92.14805535 | 6.525881815 | 0.004165659 |
| 54 | ENSMUSG00000089739 | Gm20431       | 89.05463279 | 6.47661876  | 0.006149306 |
| 55 | ENSMUSG00000097561 | 4632411P08Rik | 87.32807136 | 6.448373574 | 0.006149306 |
| 56 | ENSMUSG00000097373 | Gm26877       | 87.32807136 | 6.448373574 | 0.006149306 |
| 57 | ENSMUSG00000094817 | Cphx3         | 87.32807136 | 6.448373574 | 0.006149306 |
| 58 | ENSMUSG00000090104 | Slmapos2      | 87.32807136 | 6.448373574 | 0.006149306 |
| 59 | ENSMUSG00000086935 | Gm15956       | 87.32807136 | 6.448373574 | 0.006149306 |
| 60 | ENSMUSG00000045569 | Mc2r          | 87.32807136 | 6.448373574 | 0.006149306 |
| 61 | ENSMUSG00000043430 | Psap11        | 87.32807136 | 6.448373574 | 0.006149306 |
| 62 | ENSMUSG00000037224 | Zfyve28       | 87.32807136 | 6.448373574 | 0.006149306 |
| 63 | ENSMUSG00000025930 | Msc           | 87.32807136 | 6.448373574 | 0.006149306 |
| 64 | ENSMUSG00000022053 | Ebf2          | 87.32807136 | 6.448373574 | 0.006149306 |
| 65 | ENSMUSG0000002057  | Foxn1         | 87.32807136 | 6.448373574 | 0.006149306 |
| 66 | ENSMUSG00000028004 | Npy2r         | 87.32807136 | 6.448373574 | 0.006149306 |
| 67 | ENSMUSG00000094526 | Gm21451       | 84.30658887 | 6.397573482 | 0.006149306 |
| 68 | ENSMUSG00000056978 | Hamp2         | 80.13406542 | 6.324343765 | 0.009223959 |
| 69 | ENSMUSG00000050762 | Prss27        | 80.13406542 | 6.324343765 | 0.009223959 |
| 70 | ENSMUSG00000044303 | Cdkn2a        | 80.13406542 | 6.324343765 | 0.009223959 |
| 71 | ENSMUSG00000040205 | Cuzd1         | 80.13406542 | 6.324343765 | 0.009223959 |
| 72 | ENSMUSG00000037843 | Vstm2l        | 80.13406542 | 6.324343765 | 0.009223959 |
| 73 | ENSMUSG00000033470 | Cysltr2       | 80.13406542 | 6.324343765 | 0.009223959 |
| 74 | ENSMUSG00000029195 | Klb           | 80.13406542 | 6.324343765 | 0.009223959 |
| 75 | ENSMUSG00000099871 | Gm21742       | 76.39318232 | 6.255371986 | 0.009223959 |
| 76 | ENSMUSG00000078886 | Gm2026        | 73.73140012 | 6.204207248 | 0.014078675 |
| 77 | ENSMUSG00000079022 | Col22a1       | 72.94005947 | 6.188639471 | 0.014078675 |
| 78 | ENSMUSG00000086591 | Dnah2os       | 72.94005947 | 6.188639471 | 0.014078675 |
| 79 | ENSMUSG00000092373 | Gm20535       | 72.94005947 | 6.188639471 | 0.014078675 |
| 80 | ENSMUSG00000096446 | Gm8104        | 72.94005947 | 6.188639471 | 0.014078675 |
| 81 | ENSMUSG00000105134 | Gm42923       | 72.94005947 | 6.188639471 | 0.014078675 |
| 82 | ENSMUSG00000106383 | E330034L11Rik | 72.94005947 | 6.188639471 | 0.014078675 |
| 83 | ENSMUSG00000074625 | Arhgap40      | 72.94005947 | 6.188639471 | 0.014078675 |
| 84 | ENSMUSG00000050982 | Apol10a       | 72.94005947 | 6.188639471 | 0.014078675 |
| 85 | ENSMUSG00000024306 | Ccdc178       | 72.94005947 | 6.188639471 | 0.014078675 |
| 86 | ENSMUSG00000039084 | Chad          | 72.94005947 | 6.188639471 | 0.014078675 |
| 87 | ENSMUSG00000044528 | Tram11l       | 72.94005947 | 6.188639471 | 0.014078675 |
| 88 | ENSMUSG00000107482 | Gm45233       | 71.6451384  | 6.162796906 | 0.014078675 |
| 89 | ENSMUSG00000109357 | Gm45236       | 71.21349804 | 6.154078815 | 0.014078675 |
| 90 | ENSMUSG00000083500 | Gm15470       | 69.84663691 | 6.126118747 | 0.014078675 |
| 91 | ENSMUSG00000078967 | Gm3272        | 68.9833562  | 6.108176416 | 0.014078675 |
| 92 | ENSMUSG00000026344 | Lypd1         | 66.46545412 | 6.05453278  | 0.021900161 |
| 93 | ENSMUSG00000071532 | Gm10335       | 66.24963394 | 6.049840578 | 0.021900161 |

|     |                    |               |             |             |             |
|-----|--------------------|---------------|-------------|-------------|-------------|
| 94  | ENSMUSG00000094784 | Gm8122        | 66.24963394 | 6.049840578 | 0.021900161 |
| 95  | ENSMUSG00000113149 | AC099934.3    | 66.03381376 | 6.045133066 | 0.021900161 |
| 96  | ENSMUSG00000107071 | Gm42420       | 65.74605352 | 6.038832393 | 0.021900161 |
| 97  | ENSMUSG00000104529 | Rbakdn        | 65.74605352 | 6.038832393 | 0.021900161 |
| 98  | ENSMUSG00000099354 | 1700124L16Rik | 65.74605352 | 6.038832393 | 0.021900161 |
| 99  | ENSMUSG00000072675 | Duxbl2        | 65.74605352 | 6.038832393 | 0.021900161 |
| 100 | ENSMUSG00000097757 | Gm17518       | 65.74605352 | 6.038832393 | 0.021900161 |
| 101 | ENSMUSG00000024598 | Fbn2          | 65.74605352 | 6.038832393 | 0.021900161 |
| 102 | ENSMUSG00000035580 | Kcnh8         | 65.74605352 | 6.038832393 | 0.021900161 |
| 103 | ENSMUSG00000037922 | Bank1         | 65.74605352 | 6.038832393 | 0.021900161 |
| 104 | ENSMUSG00000044216 | Kcnj4         | 65.74605352 | 6.038832393 | 0.021900161 |
| 105 | ENSMUSG00000045083 | Lingo2        | 65.74605352 | 6.038832393 | 0.021900161 |
| 106 | ENSMUSG00000070323 | Mmp27         | 65.74605352 | 6.038832393 | 0.021900161 |
| 107 | ENSMUSG00000097797 | Gm26901       | 65.74605352 | 6.038832393 | 0.021900161 |
| 108 | ENSMUSG00000078122 | F630028O10Rik | 65.74605352 | 6.038832393 | 0.021900161 |
| 109 | ENSMUSG00000089797 | Gm16118       | 65.74605352 | 6.038832393 | 0.021900161 |
| 110 | ENSMUSG00000032131 | Abcg4         | 65.74605352 | 6.038832393 | 0.021900161 |
| 111 | ENSMUSG00000090256 | Alms1-ps1     | 63.37203156 | 5.985774361 | 0.021900161 |
| 112 | ENSMUSG00000015854 | Cd51          | 63.34781128 | 5.985222869 | 1.18E-07    |
| 113 | ENSMUSG00000073403 | Gm10499       | 62.72457103 | 5.970958794 | 0.021900161 |
| 114 | ENSMUSG00000105058 | Gm43590       | 62.72457103 | 5.970958794 | 0.021900161 |
| 115 | ENSMUSG00000066952 | Myo1h         | 61.06994966 | 5.932390751 | 0.021900161 |
| 116 | ENSMUSG00000043483 | Gm6863        | 60.56636924 | 5.920445024 | 0.021900161 |
| 117 | ENSMUSG00000103865 | Gm37416       | 60.20666894 | 5.911851394 | 0.034782609 |
| 118 | ENSMUSG00000111824 | AC161250.2    | 59.63114847 | 5.897994218 | 0.034782609 |
| 119 | ENSMUSG00000074417 | Gm14548       | 59.12756805 | 5.885759034 | 0.034782609 |
| 120 | ENSMUSG00000113771 | AC160108.1    | 58.55204758 | 5.871647718 | 0.034782609 |
| 121 | ENSMUSG00000089900 | Tbc1d22bos    | 58.55204758 | 5.871647718 | 0.034782609 |
| 122 | ENSMUSG00000097766 | 5730420D15Rik | 58.55204758 | 5.871647718 | 0.034782609 |
| 123 | ENSMUSG00000001021 | S100a3        | 58.55204758 | 5.871647718 | 0.034782609 |
| 124 | ENSMUSG00000025467 | Prap1         | 58.55204758 | 5.871647718 | 0.034782609 |
| 125 | ENSMUSG00000026241 | Nppc          | 58.55204758 | 5.871647718 | 0.034782609 |
| 126 | ENSMUSG00000028217 | Cdh17         | 58.55204758 | 5.871647718 | 0.034782609 |
| 127 | ENSMUSG00000040649 | Rimklb        | 58.55204758 | 5.871647718 | 0.034782609 |
| 128 | ENSMUSG00000053214 | Gm9899        | 58.55204758 | 5.871647718 | 0.034782609 |
| 129 | ENSMUSG00000056222 | Spock1        | 58.55204758 | 5.871647718 | 0.034782609 |
| 130 | ENSMUSG00000053522 | Lgals7        | 58.55204758 | 5.871647718 | 0.034782609 |
| 131 | ENSMUSG00000060204 | Gm5868        | 58.55204758 | 5.871647718 | 0.034782609 |
| 132 | ENSMUSG00000061816 | My11          | 58.55204758 | 5.871647718 | 0.034782609 |
| 133 | ENSMUSG00000110613 | Lncbatel      | 58.55204758 | 5.871647718 | 0.034782609 |
| 134 | ENSMUSG00000091956 | C2cd4b        | 58.55204758 | 5.871647718 | 0.034782609 |
| 135 | ENSMUSG00000044206 | Vsig4         | 58.55204758 | 5.871647718 | 0.034782609 |
| 136 | ENSMUSG00000091754 | Gm3636        | 58.55204758 | 5.871647718 | 0.034782609 |
| 137 | ENSMUSG00000096024 | Gm17174       | 58.55204758 | 5.871647718 | 0.034782609 |
| 138 | ENSMUSG00000097088 | Gm26615       | 58.55204758 | 5.871647718 | 0.034782609 |
| 139 | ENSMUSG00000100454 | Gm28901       | 58.3362274  | 5.866320185 | 0.034782609 |
| 140 | ENSMUSG00000067017 | Gm3608        | 57.32906657 | 5.841194884 | 0.034782609 |
| 141 | ENSMUSG00000066878 | Gm10184       | 56.82548615 | 5.828466216 | 0.034782609 |
| 142 | ENSMUSG00000097610 | A930012L18Rik | 55.89026538 | 5.80452512  | 0.034782609 |

|     |                    |               |             |             |             |
|-----|--------------------|---------------|-------------|-------------|-------------|
| 143 | ENSMUSG00000045114 | Prrt2         | 55.6744452  | 5.798943371 | 0.034782609 |
| 144 | ENSMUSG00000047443 | Erfe          | 55.24280484 | 5.787714666 | 0.034782609 |
| 145 | ENSMUSG00000104563 | Gm43041       | 53.80400365 | 5.749641625 | 0.034782609 |
| 146 | ENSMUSG00000073830 | Mup14         | 45.03929861 | 5.493112456 | 0.014078675 |
| 147 | ENSMUSG00000035775 | Krt20         | 33.79041448 | 5.078542142 | 8.54E-10    |
| 148 | ENSMUSG00000081855 | Rpl17-ps5     | 31.01489121 | 4.954889159 | 0.014078675 |
| 149 | ENSMUSG00000069862 | Rps12-ps9     | 30.75867919 | 4.942921648 | 0.003042849 |
| 150 | ENSMUSG00000061100 | Retnla        | 30.71621794 | 4.940928684 | 1.27E-07    |
| 151 | ENSMUSG00000026405 | C4bp          | 29.56768019 | 4.885949152 | 3.89E-05    |
| 152 | ENSMUSG00000058427 | Cxcl2         | 29.17846728 | 4.866832196 | 5.95E-06    |
| 153 | ENSMUSG00000062593 | Lilrb4a       | 28.2483118  | 4.820092746 | 0.000488131 |
| 154 | ENSMUSG00000021208 | Ifi2712b      | 26.90891759 | 4.750012455 | 1.06E-05    |
| 155 | ENSMUSG00000030495 | Slc7a10       | 22.26542206 | 4.476733055 | 0.000243817 |
| 156 | ENSMUSG00000110439 | Gm21320       | 21.99548333 | 4.459135398 | 5.95E-06    |
| 157 | ENSMUSG00000109129 | Gm44973       | 21.82148559 | 4.447677417 | 0.000797167 |
| 158 | ENSMUSG00000040405 | Havcr1        | 21.6714209  | 4.437721843 | 7.17E-09    |
| 159 | ENSMUSG00000036110 | Slc17a2       | 21.66169206 | 4.437074036 | 0.000305695 |
| 160 | ENSMUSG00000068699 | Flnc          | 19.2475083  | 4.266599788 | 1.35E-07    |
| 161 | ENSMUSG00000053166 | Cdh22         | 18.78678729 | 4.231646469 | 0.000621965 |
| 162 | ENSMUSG00000030708 | Dnajb13       | 18.06806109 | 4.175369792 | 0.000797167 |
| 163 | ENSMUSG00000069830 | Nlrp1a        | 17.3493349  | 4.116808452 | 0.001028032 |
| 164 | ENSMUSG00000063133 | Klk1b1        | 17.3493349  | 4.116808452 | 0.001028032 |
| 165 | ENSMUSG00000025420 | Katnal2       | 17.3493349  | 4.116808452 | 0.001028032 |
| 166 | ENSMUSG00000020808 | Fam64a        | 17.3493349  | 4.116808452 | 0.001028032 |
| 167 | ENSMUSG00000016349 | Eef1a2        | 17.3493349  | 4.116808452 | 0.001028032 |
| 168 | ENSMUSG00000090713 | Gm8127        | 17.18515066 | 4.103090594 | 2.70E-07    |
| 169 | ENSMUSG00000040809 | Chil3         | 16.74345654 | 4.065525485 | 3.67E-06    |
| 170 | ENSMUSG00000041309 | Nkx6-2        | 16.6163321  | 4.05453005  | 0.000291391 |
| 171 | ENSMUSG00000039521 | Foxp3         | 16.59071614 | 4.052304256 | 0.000797167 |
| 172 | ENSMUSG00000039252 | Lgi2          | 16.205935   | 4.018450354 | 6.77E-05    |
| 173 | ENSMUSG00000074677 | Sirpb1c       | 15.83351512 | 3.984909672 | 0.00013422  |
| 174 | ENSMUSG00000034394 | Lif           | 15.7668998  | 3.97882711  | 1.13E-06    |
| 175 | ENSMUSG00000010435 | Spaca7        | 15.56116916 | 3.959878554 | 0.000160239 |
| 176 | ENSMUSG00000067786 | Nnat          | 15.27880322 | 3.933459638 | 7.96E-07    |
| 177 | ENSMUSG00000034706 | Dnaic2        | 15.19315632 | 3.92534971  | 0.002294842 |
| 178 | ENSMUSG00000030376 | Slc8a2        | 15.18291088 | 3.924376507 | 0.000191901 |
| 179 | ENSMUSG00000054013 | Tmem179       | 14.47443013 | 3.855434644 | 0.003042849 |
| 180 | ENSMUSG00000024912 | Fosl1         | 14.28846959 | 3.836779495 | 5.06E-06    |
| 181 | ENSMUSG00000029380 | Cxcl1         | 13.90053001 | 3.797067988 | 7.76E-07    |
| 182 | ENSMUSG00000028965 | Tnfrsf9       | 13.66987776 | 3.772928437 | 0.000408153 |
| 183 | ENSMUSG00000026981 | Il1rn         | 13.61390873 | 3.767009438 | 3.56E-05    |
| 184 | ENSMUSG00000043843 | Tmem145       | 13.29161948 | 3.732444991 | 0.000408153 |
| 185 | ENSMUSG00000107499 | Ccdc142       | 13.22675076 | 3.725386792 | 0.002294842 |
| 186 | ENSMUSG00000035385 | Ccl2          | 13.07992967 | 3.709282878 | 1.07E-06    |
| 187 | ENSMUSG00000085184 | 4933439K11Rik | 13.03697774 | 3.704537554 | 0.005479339 |
| 188 | ENSMUSG00000040026 | Saa3          | 13.03697774 | 3.704537554 | 0.005479339 |
| 189 | ENSMUSG00000035683 | Melk          | 13.03697774 | 3.704537554 | 0.005479339 |
| 190 | ENSMUSG00000052353 | Cemip         | 12.53510292 | 3.647901936 | 0.000608346 |
| 191 | ENSMUSG00000021250 | Fos           | 12.32777721 | 3.623840789 | 8.17E-07    |

|     |                    |               |             |             |             |
|-----|--------------------|---------------|-------------|-------------|-------------|
| 192 | ENSMUSG00000046203 | Spr2g         | 12.31825154 | 3.622725589 | 0.007447428 |
| 193 | ENSMUSG00000032291 | Crabp1        | 12.3008005  | 3.6206803   | 4.15E-05    |
| 194 | ENSMUSG00000072596 | Ear2          | 11.84253243 | 3.565905717 | 0.000622182 |
| 195 | ENSMUSG00000015852 | Ferls         | 11.82729976 | 3.56404883  | 2.16E-05    |
| 196 | ENSMUSG00000026989 | Dap1l         | 11.59952535 | 3.535993867 | 0.010215054 |
| 197 | ENSMUSG00000026009 | Icos          | 11.59952535 | 3.535993867 | 0.010215054 |
| 198 | ENSMUSG00000090942 | F830016B08Rik | 11.59952535 | 3.535993867 | 0.010215054 |
| 199 | ENSMUSG00000035811 | Ugt2b35       | 11.58586169 | 3.534293442 | 0.000622182 |
| 200 | ENSMUSG00000025582 | Nptx1         | 11.40032807 | 3.511003437 | 0.001141053 |
| 201 | ENSMUSG00000022780 | Melft         | 11.07252021 | 3.468911726 | 0.000851461 |
| 202 | ENSMUSG00000016942 | Tmprss6       | 10.90419093 | 3.446810824 | 0.000382127 |
| 203 | ENSMUSG00000032269 | Htr3a         | 10.88793584 | 3.444658565 | 2.21E-05    |
| 204 | ENSMUSG00000091412 | Gm2895        | 10.88079916 | 3.443712616 | 0.010215054 |
| 205 | ENSMUSG00000029072 | Tas1r3        | 10.88079916 | 3.443712616 | 0.010215054 |
| 206 | ENSMUSG00000009356 | Lpo           | 10.78632976 | 3.431132141 | 1.03E-05    |
| 207 | ENSMUSG00000032816 | Igdcc4        | 10.64381151 | 3.411942962 | 0.001774106 |
| 208 | ENSMUSG00000027322 | Siglec1       | 10.5749988  | 3.402585594 | 1.91E-05    |
| 209 | ENSMUSG00000092595 | Gm20427       | 10.39344574 | 3.377602126 | 0.000499278 |
| 210 | ENSMUSG00000026358 | Rgs1          | 10.17680277 | 3.347212478 | 0.000291475 |
| 211 | ENSMUSG00000024803 | Ankrd1        | 10.16273287 | 3.345216505 | 5.55E-06    |
| 212 | ENSMUSG00000110696 | Gm45706       | 10.16207296 | 3.345122823 | 0.014145884 |
| 213 | ENSMUSG00000109036 | 2210406H18Rik | 10.16207296 | 3.345122823 | 0.014145884 |
| 214 | ENSMUSG00000039114 | Nrn1          | 10.16207296 | 3.345122823 | 0.014145884 |
| 215 | ENSMUSG00000046338 | Gpat2         | 10.16207296 | 3.345122823 | 0.014145884 |
| 216 | ENSMUSG00000040229 | Gpr34         | 10.16207296 | 3.345122823 | 0.014145884 |
| 217 | ENSMUSG00000030592 | Ryr1          | 10.16207296 | 3.345122823 | 0.014145884 |
| 218 | ENSMUSG00000014602 | Kif1a         | 10.12180789 | 3.339395092 | 0.000101616 |
| 219 | ENSMUSG00000102543 | Pcdhgc5       | 9.807864299 | 3.293939018 | 0.019786881 |
| 220 | ENSMUSG00000023034 | Nr4a1         | 9.764797239 | 3.287590088 | 5.43E-06    |
| 221 | ENSMUSG00000092412 | Gm20507       | 9.681156949 | 3.275179467 | 0.002811985 |
| 222 | ENSMUSG00000106943 | Dancr         | 9.575721265 | 3.259381158 | 0.009774911 |
| 223 | ENSMUSG00000025789 | St8sia2       | 9.532495775 | 3.252853986 | 0.002316369 |
| 224 | ENSMUSG00000086536 | Gm12264       | 9.450534033 | 3.240395856 | 0.019786881 |
| 225 | ENSMUSG00000032033 | Barx2         | 9.443346771 | 3.239298249 | 0.019786881 |
| 226 | ENSMUSG00000048498 | Cd300e        | 9.443346771 | 3.239298249 | 0.019786881 |
| 227 | ENSMUSG00000053783 | 1700016K19Rik | 9.443346771 | 3.239298249 | 0.019786881 |
| 228 | ENSMUSG00000005355 | Casp14        | 9.350306463 | 3.225013651 | 0.001005195 |
| 229 | ENSMUSG00000038670 | Mybpc2        | 9.223479094 | 3.205311037 | 0.000192859 |
| 230 | ENSMUSG00000079808 | AC168977.1    | 9.216049306 | 3.204148435 | 0.019786881 |
| 231 | ENSMUSG00000038418 | Egr1          | 9.152115071 | 3.194105192 | 7.79E-06    |
| 232 | ENSMUSG00000066513 | Klk1b4        | 9.13456097  | 3.191335391 | 0.003567541 |
| 233 | ENSMUSG00000076709 | Ighv1-47      | 9.130778387 | 3.190737853 | 0.003567541 |
| 234 | ENSMUSG00000074220 | Zfp382        | 9.130778387 | 3.190737853 | 0.003567541 |
| 235 | ENSMUSG00000064125 | Prr36         | 9.028223982 | 3.174442211 | 0.019786881 |
| 236 | ENSMUSG00000035352 | Ccl12         | 8.886605797 | 3.151632493 | 0.000257011 |
| 237 | ENSMUSG00000051435 | Fhad1         | 8.752520106 | 3.129698471 | 0.004550577 |
| 238 | ENSMUSG00000043456 | Zfp536        | 8.724620577 | 3.125092392 | 0.027969425 |
| 239 | ENSMUSG00000089997 | 1810020O05Rik | 8.724620577 | 3.125092392 | 0.027969425 |
| 240 | ENSMUSG00000030865 | Chp2          | 8.724620577 | 3.125092392 | 0.027969425 |

|     |                    |               |             |             |             |
|-----|--------------------|---------------|-------------|-------------|-------------|
| 241 | ENSMUSG00000024076 | Vit           | 8.724620577 | 3.125092392 | 0.027969425 |
| 242 | ENSMUSG00000022824 | Muc13         | 8.724620577 | 3.125092392 | 0.027969425 |
| 243 | ENSMUSG00000029419 | Gm996         | 8.724620577 | 3.125092392 | 0.027969425 |
| 244 | ENSMUSG00000002020 | Ltbp2         | 8.628105183 | 3.109043764 | 3.53E-05    |
| 245 | ENSMUSG00000049649 | Gpr3          | 8.374261825 | 3.065962025 | 0.005837072 |
| 246 | ENSMUSG00000025044 | Msr1          | 8.249142078 | 3.044244085 | 0.004771142 |
| 247 | ENSMUSG00000090440 | Gm9732        | 8.223598301 | 3.039769795 | 9.26E-05    |
| 248 | ENSMUSG00000021922 | Itih4         | 8.18489311  | 3.032963576 | 0.002125618 |
| 249 | ENSMUSG00000000567 | Sox9          | 8.184704764 | 3.032930377 | 9.76E-05    |
| 250 | ENSMUSG00000110575 | 6330537M06Rik | 8.005894384 | 3.001062583 | 0.039970491 |
| 251 | ENSMUSG00000084885 | 3010001F23Rik | 8.005894384 | 3.001062583 | 0.039970491 |
| 252 | ENSMUSG00000058626 | Capn11        | 8.005894384 | 3.001062583 | 0.039970491 |
| 253 | ENSMUSG00000053054 | Adh6a         | 8.005894384 | 3.001062583 | 0.039970491 |
| 254 | ENSMUSG00000046006 | Gapt          | 8.005894384 | 3.001062583 | 0.039970491 |
| 255 | ENSMUSG00000022431 | Ribc2         | 8.005894384 | 3.001062583 | 0.039970491 |
| 256 | ENSMUSG00000005800 | Mmp8          | 8.005894384 | 3.001062583 | 0.039970491 |
| 257 | ENSMUSG00000031872 | Bean1         | 8.005894384 | 3.001062583 | 0.039970491 |
| 258 | ENSMUSG00000026204 | Ptpn          | 7.996003544 | 2.999279112 | 0.00753089  |
| 259 | ENSMUSG00000059900 | Tmem40        | 7.996003544 | 2.999279112 | 0.00753089  |
| 260 | ENSMUSG00000046179 | E2f8          | 7.992471338 | 2.998641665 | 0.005759502 |
| 261 | ENSMUSG00000005124 | Wisp1         | 7.987874818 | 2.997811724 | 0.000367677 |
| 262 | ENSMUSG00000037868 | Egr2          | 7.763694807 | 2.956743406 | 0.000639659 |
| 263 | ENSMUSG00000045502 | Hcar2         | 7.735800599 | 2.951550608 | 0.006974917 |
| 264 | ENSMUSG00000031362 | Xlr4c         | 7.69684212  | 2.944266655 | 0.039970491 |
| 265 | ENSMUSG00000035914 | Cd276         | 7.671414794 | 2.93949267  | 0.00029335  |
| 266 | ENSMUSG00000076436 | Oxct2a        | 7.668093073 | 2.938867848 | 0.039970491 |
| 267 | ENSMUSG00000029212 | Gabrb1        | 7.617745263 | 2.929364045 | 0.009774911 |
| 268 | ENSMUSG00000037379 | Spon2         | 7.617745263 | 2.929364045 | 0.009774911 |
| 269 | ENSMUSG00000097272 | Gm26649       | 7.443374602 | 2.895956844 | 0.001080015 |
| 270 | ENSMUSG00000001131 | Timp1         | 7.434494059 | 2.894234566 | 0.000373606 |
| 271 | ENSMUSG00000028782 | Adgrb2        | 7.407950875 | 2.889074531 | 0.004025529 |
| 272 | ENSMUSG00000021256 | Vash1         | 7.239486983 | 2.855887466 | 0.012766938 |
| 273 | ENSMUSG00000039518 | Cdsn          | 7.204812696 | 2.848960925 | 0.001623044 |
| 274 | ENSMUSG00000019102 | Aldh3a1       | 7.200300471 | 2.848057112 | 0.000720674 |
| 275 | ENSMUSG00000027995 | Tlr2          | 7.188373723 | 2.845665416 | 7.78E-05    |
| 276 | ENSMUSG00000026822 | Lcn2          | 7.174843367 | 2.842947337 | 5.53E-05    |
| 277 | ENSMUSG00000003545 | Fosb          | 7.108800215 | 2.82960609  | 0.000265115 |
| 278 | ENSMUSG00000053687 | Dpep2         | 7.019479757 | 2.81136411  | 0.005619692 |
| 279 | ENSMUSG00000061780 | Cfd           | 6.99022039  | 2.805337942 | 6.01E-05    |
| 280 | ENSMUSG00000112241 | Sumo3         | 6.980639196 | 2.803359146 | 0.001948681 |
| 281 | ENSMUSG00000022696 | Sidt1         | 6.965788381 | 2.800286645 | 0.0126381   |
| 282 | ENSMUSG00000062760 | 1810041L15Rik | 6.865366016 | 2.779336637 | 0.001378134 |
| 283 | ENSMUSG00000042254 | Cilp          | 6.861228702 | 2.778466956 | 0.016782554 |
| 284 | ENSMUSG00000059108 | Ifitm6        | 6.861228702 | 2.778466956 | 0.016782554 |
| 285 | ENSMUSG00000106870 | Gm43681       | 6.861228702 | 2.778466956 | 0.016782554 |
| 286 | ENSMUSG00000112388 | AC163033.2    | 6.861228702 | 2.778466956 | 0.016782554 |
| 287 | ENSMUSG00000059974 | Ntm           | 6.806513298 | 2.766915953 | 0.001080015 |
| 288 | ENSMUSG00000044405 | Adig          | 6.70781709  | 2.74584335  | 0.000603732 |
| 289 | ENSMUSG00000035373 | Ccl7          | 6.644758275 | 2.732216718 | 0.000799282 |

|     |                    |               |             |             |             |
|-----|--------------------|---------------|-------------|-------------|-------------|
| 290 | ENSMUSG00000032915 | Adgre4        | 6.631008639 | 2.729228335 | 0.006664909 |
| 291 | ENSMUSG00000110332 | Gm45396       | 6.631008639 | 2.729228335 | 0.006664909 |
| 292 | ENSMUSG00000103309 | BC037039      | 6.613339579 | 2.725378982 | 0.039696281 |
| 293 | ENSMUSG00000016493 | Cd46          | 6.587388983 | 2.719706743 | 0.002612268 |
| 294 | ENSMUSG00000027398 | Il1b          | 6.549784978 | 2.711447545 | 0.001011115 |
| 295 | ENSMUSG00000078640 | Gm11627       | 6.482970421 | 2.69665499  | 0.022208097 |
| 296 | ENSMUSG00000060188 | Cxcl17        | 6.482970421 | 2.69665499  | 0.022208097 |
| 297 | ENSMUSG00000030142 | Clec4e        | 6.482970421 | 2.69665499  | 0.022208097 |
| 298 | ENSMUSG00000025576 | Rbfox3        | 6.482970421 | 2.69665499  | 0.022208097 |
| 299 | ENSMUSG00000033342 | Plppr5        | 6.482970421 | 2.69665499  | 0.022208097 |
| 300 | ENSMUSG00000113975 | AC102435.3    | 6.452446902 | 2.689846364 | 0.015514096 |
| 301 | ENSMUSG00000074203 | G430095P16Rik | 6.452446902 | 2.689846364 | 0.015514096 |
| 302 | ENSMUSG00000002831 | Plin4         | 6.299599182 | 2.655260039 | 0.000177904 |
| 303 | ENSMUSG00000026628 | Atf3          | 6.287255149 | 2.652430312 | 0.000182527 |
| 304 | ENSMUSG00000095497 | Igkv1-122     | 6.195776162 | 2.631285024 | 0.019112419 |
| 305 | ENSMUSG00000034686 | Prr7          | 6.195776162 | 2.631285024 | 0.019112419 |
| 306 | ENSMUSG00000110051 | Gm45322       | 6.170823298 | 2.625462984 | 0.003560686 |
| 307 | ENSMUSG00000015947 | Fcgr1         | 6.168926966 | 2.625019566 | 0.000272634 |
| 308 | ENSMUSG00000097231 | Gm26852       | 6.10471214  | 2.609923268 | 0.029588432 |
| 309 | ENSMUSG00000060780 | Lrrtm1        | 6.10471214  | 2.609923268 | 0.029588432 |
| 310 | ENSMUSG00000060183 | Cxcl11        | 6.10471214  | 2.609923268 | 0.029588432 |
| 311 | ENSMUSG00000030144 | Clec4d        | 6.10471214  | 2.609923268 | 0.029588432 |
| 312 | ENSMUSG00000089783 | Gm454         | 6.10471214  | 2.609923268 | 0.029588432 |
| 313 | ENSMUSG00000075266 | Cenpw         | 6.015748874 | 2.588744343 | 0.004639651 |
| 314 | ENSMUSG00000108199 | Gm44249       | 5.949626245 | 2.572799041 | 0.029588432 |
| 315 | ENSMUSG00000033006 | Sox10         | 5.939105423 | 2.570245642 | 0.023630413 |
| 316 | ENSMUSG00000022454 | Nell2         | 5.939105423 | 2.570245642 | 0.023630413 |
| 317 | ENSMUSG00000026414 | Tnnt2         | 5.939105423 | 2.570245642 | 0.023630413 |
| 318 | ENSMUSG00000091131 | Gm7945        | 5.922853994 | 2.566292522 | 0.029588432 |
| 319 | ENSMUSG00000106867 | Gm43800       | 5.863778182 | 2.551830529 | 0.013538161 |
| 320 | ENSMUSG00000032661 | Oas3          | 5.862995575 | 2.551637968 | 0.000685273 |
| 321 | ENSMUSG00000055782 | Abcd2         | 5.802304276 | 2.536625953 | 0.008737165 |
| 322 | ENSMUSG00000046245 | Pilra         | 5.74895943  | 2.52330085  | 0.005195924 |
| 323 | ENSMUSG00000051682 | Trem14        | 5.742455026 | 2.521667653 | 0.004033073 |
| 324 | ENSMUSG00000075027 | 4631405J19Rik | 5.726453859 | 2.517642018 | 0.029588432 |
| 325 | ENSMUSG00000026809 | Spaca9        | 5.726453859 | 2.517642018 | 0.029588432 |
| 326 | ENSMUSG00000020169 | Best3         | 5.726453859 | 2.517642018 | 0.029588432 |
| 327 | ENSMUSG00000093910 | Zfp853        | 5.726453859 | 2.517642018 | 0.029588432 |
| 328 | ENSMUSG00000038508 | Gdf15         | 5.687945314 | 2.507907595 | 0.000294067 |
| 329 | ENSMUSG00000010021 | Kif19a        | 5.682434684 | 2.506509196 | 0.029323086 |
| 330 | ENSMUSG00000020312 | Shc2          | 5.682434684 | 2.506509196 | 0.029323086 |
| 331 | ENSMUSG00000049758 | Olfir1318     | 5.682434684 | 2.506509196 | 0.029323086 |
| 332 | ENSMUSG00000022548 | Apod          | 5.664620531 | 2.501979314 | 0.000807476 |
| 333 | ENSMUSG00000069607 | Cd300ld3      | 5.64207604  | 2.49622611  | 0.00293642  |
| 334 | ENSMUSG00000022033 | Pbk           | 5.636816448 | 2.49488059  | 0.006131112 |
| 335 | ENSMUSG00000028195 | Cyr61         | 5.578039225 | 2.47975808  | 0.000331674 |
| 336 | ENSMUSG00000042436 | Mfap4         | 5.568382516 | 2.477258319 | 0.000967177 |
| 337 | ENSMUSG00000028885 | Smpdl3b       | 5.517152268 | 2.463923798 | 0.000923639 |
| 338 | ENSMUSG00000027469 | Tpx2          | 5.513073242 | 2.462856768 | 0.001351709 |

|     |                    |               |             |             |             |
|-----|--------------------|---------------|-------------|-------------|-------------|
| 339 | ENSMUSG00000091733 | Gm8094        | 5.478862562 | 2.453876414 | 0.00205304  |
| 340 | ENSMUSG00000106566 | Gm43836       | 5.433845041 | 2.441973424 | 0.005195924 |
| 341 | ENSMUSG00000033576 | Apol6         | 5.42885003  | 2.440646631 | 0.002402525 |
| 342 | ENSMUSG00000025932 | Eya1          | 5.425763944 | 2.439826282 | 0.036520717 |
| 343 | ENSMUSG00000049128 | Ivl           | 5.425763944 | 2.439826282 | 0.036520717 |
| 344 | ENSMUSG00000053113 | Socs3         | 5.385950858 | 2.429201067 | 0.000616478 |
| 345 | ENSMUSG00000086539 | Gm16759       | 5.374417161 | 2.426108307 | 0.002706795 |
| 346 | ENSMUSG00000034227 | Foxj1         | 5.370321866 | 2.425008558 | 0.000864021 |
| 347 | ENSMUSG00000014599 | Csfl          | 5.366319321 | 2.423932904 | 0.000453094 |
| 348 | ENSMUSG00000031489 | Adrb3         | 5.36488054  | 2.423546047 | 0.001006817 |
| 349 | ENSMUSG00000017943 | Gdap1l1       | 5.348195578 | 2.419052224 | 0.039696281 |
| 350 | ENSMUSG00000072944 | Nup62cl       | 5.348195578 | 2.419052224 | 0.039696281 |
| 351 | ENSMUSG00000095682 | Igkv3-1       | 5.348195578 | 2.419052224 | 0.039696281 |
| 352 | ENSMUSG00000040528 | Milr1         | 5.329811398 | 2.414084482 | 0.004509703 |
| 353 | ENSMUSG00000057346 | Apol9a        | 5.315056601 | 2.410085055 | 0.000690125 |
| 354 | ENSMUSG00000095379 | Gm22108       | 5.282943603 | 2.401342009 | 0.003989127 |
| 355 | ENSMUSG00000091243 | Vgll3         | 5.24614045  | 2.391256432 | 0.003038621 |
| 356 | ENSMUSG00000084350 | Znf41-ps      | 5.193876664 | 2.376811756 | 0.015514096 |
| 357 | ENSMUSG00000004791 | Pgf           | 5.180999532 | 2.373230453 | 0.007680727 |
| 358 | ENSMUSG00000038968 | Klk1b16       | 5.17737592  | 2.372221073 | 0.014225315 |
| 359 | ENSMUSG00000074771 | Ankef1        | 5.169093205 | 2.369911216 | 0.045651874 |
| 360 | ENSMUSG00000006143 | Upk3bl        | 5.169093205 | 2.369911216 | 0.045651874 |
| 361 | ENSMUSG00000020354 | Sgcd          | 5.169093205 | 2.369911216 | 0.045651874 |
| 362 | ENSMUSG00000013974 | Mcemp1        | 5.169093205 | 2.369911216 | 0.045651874 |
| 363 | ENSMUSG00000045087 | S1pr5         | 5.169093205 | 2.369911216 | 0.045651874 |
| 364 | ENSMUSG00000032419 | Tbx18         | 5.077124168 | 2.344011544 | 0.028743676 |
| 365 | ENSMUSG00000054418 | 2900041M22Rik | 5.077124168 | 2.344011544 | 0.028743676 |
| 366 | ENSMUSG00000087050 | Dhrs13os      | 5.067056246 | 2.341147843 | 0.029323086 |
| 367 | ENSMUSG00000029093 | Sores2        | 5.040601449 | 2.333595888 | 0.005139673 |
| 368 | ENSMUSG00000007783 | Cpt1c         | 4.996844086 | 2.321017203 | 0.001788412 |
| 369 | ENSMUSG00000034040 | Wbscr17       | 4.983484678 | 2.317154893 | 0.012692048 |
| 370 | ENSMUSG00000054200 | Ffar4         | 4.983484678 | 2.317154893 | 0.012692048 |
| 371 | ENSMUSG00000079017 | Ifi2712a      | 4.966103081 | 2.312114208 | 0.000797623 |
| 372 | ENSMUSG00000022878 | Adipoq        | 4.962866372 | 2.31117361  | 0.000875122 |
| 373 | ENSMUSG00000017716 | Birc5         | 4.907339551 | 2.294941098 | 0.004862976 |
| 374 | ENSMUSG00000008845 | Cd163         | 4.88288861  | 2.287734867 | 0.028743676 |
| 375 | ENSMUSG00000044595 | Dnd1          | 4.864911742 | 2.282413632 | 0.01990983  |
| 376 | ENSMUSG00000036377 | C530008M17Rik | 4.852818324 | 2.278822851 | 0.014760757 |
| 377 | ENSMUSG00000039385 | Cdh6          | 4.816005088 | 2.267836916 | 0.003817017 |
| 378 | ENSMUSG00000030278 | Cidec         | 4.801852417 | 2.263591064 | 0.001088583 |
| 379 | ENSMUSG00000035186 | Ubd           | 4.780323833 | 2.257108354 | 0.001230213 |
| 380 | ENSMUSG00000027559 | Car3          | 4.767846192 | 2.253337696 | 0.001020449 |
| 381 | ENSMUSG00000037188 | Grhl3         | 4.758914904 | 2.250632657 | 0.005361479 |
| 382 | ENSMUSG00000024164 | C3            | 4.757892831 | 2.250322776 | 0.001007968 |
| 383 | ENSMUSG00000028068 | Iqgap3        | 4.747023187 | 2.247023097 | 0.005988588 |
| 384 | ENSMUSG00000054999 | Naaladl1      | 4.739130638 | 2.244622431 | 0.009323198 |
| 385 | ENSMUSG00000063919 | Srrm4         | 4.731835136 | 2.242399809 | 0.011508026 |
| 386 | ENSMUSG00000036144 | Meox2         | 4.72215197  | 2.239444472 | 0.017198877 |
| 387 | ENSMUSG00000031098 | Syt8          | 4.72215197  | 2.239444472 | 0.017198877 |



|     |                    |           |             |             |             |
|-----|--------------------|-----------|-------------|-------------|-------------|
| 388 | ENSMUSG00000023992 | Trem2     | 4.715328556 | 2.237358299 | 0.004072786 |
| 389 | ENSMUSG00000043648 | Pld6      | 4.688653051 | 2.229173527 | 0.034945041 |
| 390 | ENSMUSG00000040663 | Clefl     | 4.68737563  | 2.228780412 | 0.001534783 |
| 391 | ENSMUSG00000004730 | Adgre1    | 4.679935471 | 2.226488637 | 0.001842625 |
| 392 | ENSMUSG00000048583 | Igf2      | 4.656301323 | 2.219184422 | 0.001623133 |
| 393 | ENSMUSG00000068246 | Apol9b    | 4.628716656 | 2.210612252 | 0.001591081 |
| 394 | ENSMUSG00000096372 | Gm8138    | 4.604443009 | 2.203026647 | 0.002643499 |
| 395 | ENSMUSG00000025498 | Irf7      | 4.558713731 | 2.188626817 | 0.001375362 |
| 396 | ENSMUSG00000030109 | Slc6a12   | 4.552635901 | 2.186702084 | 0.001941465 |
| 397 | ENSMUSG00000110475 | Gm45813   | 4.552447564 | 2.1866424   | 0.028123146 |
| 398 | ENSMUSG00000049988 | Lrrc25    | 4.547328667 | 2.185019282 | 0.004277524 |
| 399 | ENSMUSG00000030137 | Tuba8     | 4.520392467 | 2.176448035 | 0.003590717 |
| 400 | ENSMUSG00000046223 | Plaur     | 4.502972514 | 2.170877672 | 0.001669449 |
| 401 | ENSMUSG00000006403 | Adamts4   | 4.494417492 | 2.168134144 | 0.042605988 |
| 402 | ENSMUSG00000051439 | Cd14      | 4.492448168 | 2.167501859 | 0.00178582  |
| 403 | ENSMUSG00000030074 | Gxylt2    | 4.484003927 | 2.164787542 | 0.003427018 |
| 404 | ENSMUSG00000076617 | Ighm      | 4.466022398 | 2.158990487 | 0.0016816   |
| 405 | ENSMUSG00000104713 | Gbp6      | 4.465314958 | 2.158761938 | 0.001723527 |
| 406 | ENSMUSG00000015843 | Rxrg      | 4.454398937 | 2.155230772 | 0.007513782 |
| 407 | ENSMUSG00000058922 | Gm10052   | 4.443361205 | 2.151651424 | 0.045651874 |
| 408 | ENSMUSG00000055254 | Ntrk2     | 4.440678005 | 2.150779965 | 0.003161683 |
| 409 | ENSMUSG00000061576 | Dpp6      | 4.43349808  | 2.148445451 | 0.009186799 |
| 410 | ENSMUSG00000090171 | Ugt1a2    | 4.397075907 | 2.136544438 | 0.001734736 |
| 411 | ENSMUSG00000061947 | Serpina10 | 4.396897951 | 2.136486049 | 0.00232917  |
| 412 | ENSMUSG00000000031 | H19       | 4.396215474 | 2.1362621   | 0.033540426 |
| 413 | ENSMUSG00000085395 | Gm13056   | 4.394961839 | 2.135850639 | 0.017485384 |
| 414 | ENSMUSG00000003863 | Ppfia3    | 4.394258587 | 2.13561977  | 0.011034893 |
| 415 | ENSMUSG00000032226 | Gcnt3     | 4.392743908 | 2.135122394 | 0.004516262 |
| 416 | ENSMUSG00000000628 | Hk2       | 4.377340132 | 2.13005449  | 0.00398525  |
| 417 | ENSMUSG00000026826 | Nr4a2     | 4.33259255  | 2.115230568 | 0.00892791  |
| 418 | ENSMUSG00000022949 | Clic6     | 4.330152908 | 2.114417971 | 0.023482955 |
| 419 | ENSMUSG00000074183 | Gsta1     | 4.316779952 | 2.109955553 | 0.002410176 |
| 420 | ENSMUSG00000040836 | Gpr161    | 4.308491833 | 2.107182949 | 0.008511695 |
| 421 | ENSMUSG00000045312 | Lhfp12    | 4.308464077 | 2.107173655 | 0.002359212 |
| 422 | ENSMUSG00000052776 | Oas1a     | 4.305032677 | 2.106024188 | 0.002364808 |
| 423 | ENSMUSG00000068744 | Psrc1     | 4.292390368 | 2.101781287 | 0.00270749  |
| 424 | ENSMUSG00000018930 | Ccl4      | 4.28267074  | 2.098510764 | 0.020165681 |
| 425 | ENSMUSG00000078922 | Tgtp1     | 4.279952054 | 2.097594635 | 0.002147315 |
| 426 | ENSMUSG00000020423 | Btg2      | 4.261385238 | 2.09132248  | 0.00217928  |
| 427 | ENSMUSG00000057135 | Scimp     | 4.250076744 | 2.087488892 | 0.013408159 |
| 428 | ENSMUSG00000074874 | Ctla2b    | 4.246896672 | 2.086409008 | 0.015527944 |
| 429 | ENSMUSG00000075020 | Mir670hg  | 4.239983385 | 2.084058612 | 0.040093587 |
| 430 | ENSMUSG00000030148 | Clec4a2   | 4.219703384 | 2.077141591 | 0.007830826 |
| 431 | ENSMUSG00000033491 | Prss35    | 4.201082587 | 2.070761147 | 0.004123273 |
| 432 | ENSMUSG00000019359 | Gdpd2     | 4.199486554 | 2.070212949 | 0.027518336 |
| 433 | ENSMUSG00000019942 | Cdk1      | 4.165893522 | 2.058625965 | 0.006916237 |
| 434 | ENSMUSG00000025488 | Cox8b     | 4.14225638  | 2.05041685  | 0.008313624 |
| 435 | ENSMUSG00000038037 | Socs1     | 4.129053696 | 2.04581118  | 0.009541561 |
| 436 | ENSMUSG00000038587 | Akap12    | 4.08964688  | 2.031976279 | 0.002853775 |

|     |                    |               |             |             |             |
|-----|--------------------|---------------|-------------|-------------|-------------|
| 437 | ENSMUSG00000054659 | Pm20d2        | 4.083751296 | 2.029895008 | 0.048036813 |
| 438 | ENSMUSG00000078612 | 1700024P16Rik | 4.071015832 | 2.025388832 | 0.009101284 |
| 439 | ENSMUSG00000025017 | Pik3ap1       | 4.066427648 | 2.023761945 | 0.008715184 |
| 440 | ENSMUSG00000037887 | Dusp8         | 4.064505837 | 2.02307996  | 0.003735114 |
| 441 | ENSMUSG00000049892 | Rasd1         | 4.059446999 | 2.021283209 | 0.003382714 |
| 442 | ENSMUSG00000028341 | Nr4a3         | 4.043692506 | 2.015673295 | 0.01786172  |
| 443 | ENSMUSG00000030546 | Plin1         | 4.034867548 | 2.012521315 | 0.003627172 |
| 444 | ENSMUSG00000038943 | Prc1          | 4.023350699 | 2.008397497 | 0.012434184 |
| 445 | ENSMUSG00000056529 | Ptafr         | 4.021453315 | 2.007716972 | 0.009818818 |
| 446 | ENSMUSG00000052837 | Junb          | 3.989123707 | 1.996071864 | 0.003301813 |
| 447 | ENSMUSG00000039323 | Igfbp2        | 3.985741535 | 1.994848158 | 0.003718159 |
| 448 | ENSMUSG00000037411 | Serpine1      | 3.985122882 | 1.994624211 | 0.003875577 |
| 449 | ENSMUSG00000043687 | 1190005I06Rik | 3.983928158 | 1.994191632 | 0.02695136  |
| 450 | ENSMUSG00000050359 | Sprr1a        | 3.975752386 | 1.991227907 | 0.003611841 |
| 451 | ENSMUSG00000031129 | Slc9a9        | 3.968968731 | 1.988764196 | 0.012942608 |
| 452 | ENSMUSG00000079620 | Muc4          | 3.966687932 | 1.987934902 | 0.006910632 |
| 453 | ENSMUSG00000054855 | Rnd1          | 3.965004913 | 1.987322653 | 0.005646964 |
| 454 | ENSMUSG00000022893 | Adamts1       | 3.963538953 | 1.986789155 | 0.003618176 |
| 455 | ENSMUSG00000037613 | Tnfrsf23      | 3.962635218 | 1.986460166 | 0.007545453 |
| 456 | ENSMUSG00000027961 | Lrrc39        | 3.958938911 | 1.985113806 | 0.0447917   |
| 457 | ENSMUSG00000026177 | Slc11a1       | 3.947758815 | 1.981033852 | 0.005524764 |
| 458 | ENSMUSG00000041202 | Pla2g2d       | 3.945797443 | 1.980316898 | 0.031232938 |
| 459 | ENSMUSG00000029561 | Oasl2         | 3.941918387 | 1.978897907 | 0.003815073 |
| 460 | ENSMUSG00000033219 | Gm9758        | 3.929081528 | 1.974192104 | 0.048036813 |
| 461 | ENSMUSG00000024670 | Cd6           | 3.922328281 | 1.971710287 | 0.011444498 |
| 462 | ENSMUSG00000069516 | Lyz2          | 3.908466959 | 1.966602842 | 0.003735912 |
| 463 | ENSMUSG00000026536 | Ifi211        | 3.8997618   | 1.963386006 | 0.007082305 |
| 464 | ENSMUSG00000026387 | Sctr          | 3.899149623 | 1.963159517 | 0.01821108  |
| 465 | ENSMUSG00000076431 | Sox4          | 3.895087599 | 1.961655774 | 0.004879494 |
| 466 | ENSMUSG00000046718 | Bst2          | 3.88954833  | 1.959602634 | 0.00386915  |
| 467 | ENSMUSG00000023905 | Tnfrsf12a     | 3.877660339 | 1.955186437 | 0.004038007 |
| 468 | ENSMUSG00000026831 | 1700007K13Rik | 3.872765763 | 1.953364245 | 0.0123646   |
| 469 | ENSMUSG00000074179 | Gm10639       | 3.869162491 | 1.952021318 | 0.004874851 |
| 470 | ENSMUSG00000079277 | Hoxd3         | 3.865822277 | 1.950775314 | 0.01665597  |
| 471 | ENSMUSG00000031722 | Hp            | 3.86476303  | 1.950379957 | 0.005119627 |
| 472 | ENSMUSG00000034641 | Cd300ld       | 3.856877201 | 1.947433213 | 0.011689357 |
| 473 | ENSMUSG00000022864 | D16Ert472e    | 3.853109498 | 1.946023185 | 0.026429163 |
| 474 | ENSMUSG00000078606 | Gm4070        | 3.840331479 | 1.941230843 | 0.007983976 |
| 475 | ENSMUSG00000069515 | Lyz1          | 3.833217678 | 1.938555927 | 0.020070275 |
| 476 | ENSMUSG00000078664 | Sprr2a1       | 3.829746416 | 1.937248868 | 0.025952006 |
| 477 | ENSMUSG00000074934 | Grem1         | 3.829220453 | 1.93705072  | 0.022308897 |
| 478 | ENSMUSG00000029659 | Medag         | 3.826881348 | 1.936169171 | 0.00878727  |
| 479 | ENSMUSG00000029484 | Anxa3         | 3.816946972 | 1.932419144 | 0.004553438 |
| 480 | ENSMUSG00000053560 | Ier2          | 3.810752742 | 1.930076003 | 0.00463061  |
| 481 | ENSMUSG00000079293 | Clec7a        | 3.78848671  | 1.921621687 | 0.009559448 |
| 482 | ENSMUSG00000034266 | Batf          | 3.78446381  | 1.920088911 | 0.018255132 |
| 483 | ENSMUSG00000029816 | GpnmB         | 3.781854454 | 1.919093842 | 0.010228883 |
| 484 | ENSMUSG00000022766 | Serpind1      | 3.780767946 | 1.918679303 | 0.022886106 |
| 485 | ENSMUSG00000021950 | Anxa8         | 3.770830982 | 1.914882487 | 0.010880164 |

|     |                    |               |             |             |             |
|-----|--------------------|---------------|-------------|-------------|-------------|
| 486 | ENSMUSG00000046056 | Sbsn          | 3.759554597 | 1.910561753 | 0.010576641 |
| 487 | ENSMUSG00000030510 | Cers3         | 3.754662705 | 1.908683311 | 0.030291249 |
| 488 | ENSMUSG00000015090 | Ptgds         | 3.752683192 | 1.907922501 | 0.005226683 |
| 489 | ENSMUSG00000097518 | Gm26694       | 3.746676414 | 1.905611383 | 0.025121452 |
| 490 | ENSMUSG00000040710 | St8sia4       | 3.73976574  | 1.902947902 | 0.013550642 |
| 491 | ENSMUSG00000001943 | Vsig2         | 3.724888954 | 1.897197417 | 0.01063373  |
| 492 | ENSMUSG00000025473 | Adam8         | 3.724078212 | 1.896883372 | 0.015638697 |
| 493 | ENSMUSG00000029875 | Ccdc184       | 3.721215246 | 1.895773842 | 0.036252813 |
| 494 | ENSMUSG00000044320 | 1700001O22Rik | 3.721215246 | 1.895773842 | 0.036252813 |
| 495 | ENSMUSG00000013338 | Fer1l4        | 3.701353787 | 1.88805304  | 0.024430933 |
| 496 | ENSMUSG00000020469 | Myl7          | 3.701353787 | 1.88805304  | 0.024430933 |
| 497 | ENSMUSG00000046794 | Ppp1r3b       | 3.701353787 | 1.88805304  | 0.024430933 |
| 498 | ENSMUSG00000025650 | Col7a1        | 3.675149686 | 1.877803011 | 0.027504091 |
| 499 | ENSMUSG00000022887 | Masp1         | 3.671551957 | 1.876390016 | 0.007159032 |
| 500 | ENSMUSG00000012519 | Mlkl          | 3.667178828 | 1.87467062  | 0.012925512 |
| 501 | ENSMUSG00000066861 | Oasl1g        | 3.661350502 | 1.87237589  | 0.008445656 |
| 502 | ENSMUSG00000040726 | Hesx1         | 3.656215912 | 1.870351269 | 0.034765337 |
| 503 | ENSMUSG00000089945 | Pakap         | 3.651234901 | 1.868384487 | 0.006642872 |
| 504 | ENSMUSG00000036931 | Nfkbid        | 3.643762297 | 1.865428847 | 0.025517314 |
| 505 | ENSMUSG00000043122 | A530016L24Rik | 3.643395087 | 1.865283448 | 0.011376879 |
| 506 | ENSMUSG00000039377 | Hlx           | 3.643267302 | 1.865232848 | 0.008222764 |
| 507 | ENSMUSG00000009185 | Ccl8          | 3.62434509  | 1.857720327 | 0.00946403  |
| 508 | ENSMUSG00000041827 | Oasl1         | 3.616646344 | 1.85465253  | 0.007642577 |
| 509 | ENSMUSG00000022952 | Runx1         | 3.595621557 | 1.846241184 | 0.009792316 |
| 510 | ENSMUSG00000038963 | Slco4a1       | 3.591453829 | 1.844567969 | 0.006638098 |
| 511 | ENSMUSG00000033355 | Rtp4          | 3.591313286 | 1.844511511 | 0.007316031 |
| 512 | ENSMUSG00000039109 | F13a1         | 3.569489896 | 1.835717918 | 0.029826037 |
| 513 | ENSMUSG00000040412 | 5330417C22Rik | 3.569489896 | 1.835717918 | 0.029826037 |
| 514 | ENSMUSG00000022947 | Cbr3          | 3.562910332 | 1.833056176 | 0.009491049 |
| 515 | ENSMUSG00000059430 | Actg2         | 3.56071013  | 1.832164994 | 0.017248349 |
| 516 | ENSMUSG00000026196 | Bard1         | 3.557769118 | 1.83097289  | 0.03995467  |
| 517 | ENSMUSG00000038352 | Arl5c         | 3.557769118 | 1.83097289  | 0.03995467  |
| 518 | ENSMUSG00000061527 | Krt5          | 3.551402029 | 1.828388687 | 0.009426386 |
| 519 | ENSMUSG00000017830 | Dhx58         | 3.55069957  | 1.828103297 | 0.010375987 |
| 520 | ENSMUSG00000013707 | Tnfaip8l2     | 3.538000534 | 1.822934266 | 0.012009678 |
| 521 | ENSMUSG00000024521 | Pmaip1        | 3.537347661 | 1.822668018 | 0.007979157 |
| 522 | ENSMUSG00000034765 | Dusp5         | 3.537322394 | 1.822657713 | 0.010322954 |
| 523 | ENSMUSG00000085328 | Gm17131       | 3.533706436 | 1.821182192 | 0.043422342 |
| 524 | ENSMUSG00000027514 | Zbp1          | 3.522320756 | 1.816526292 | 0.008656669 |
| 525 | ENSMUSG00000029304 | Spp1          | 3.518637672 | 1.815016962 | 0.007045549 |
| 526 | ENSMUSG00000035429 | Ptprh         | 3.517843385 | 1.814691255 | 0.033490202 |
| 527 | ENSMUSG00000030745 | Il21r         | 3.4995347   | 1.807163113 | 0.019628363 |
| 528 | ENSMUSG00000030641 | Ddias         | 3.496633048 | 1.805966401 | 0.049075768 |
| 529 | ENSMUSG00000058589 | Anks1b        | 3.496633048 | 1.805966401 | 0.049075768 |
| 530 | ENSMUSG00000097347 | Gm17275       | 3.492653548 | 1.804323542 | 0.029156965 |
| 531 | ENSMUSG00000068606 | Gm4841        | 3.485062206 | 1.801184408 | 0.019584933 |
| 532 | ENSMUSG00000020303 | Ste2          | 3.475214011 | 1.797101825 | 0.008866149 |
| 533 | ENSMUSG00000049723 | Mmp12         | 3.473857525 | 1.796538585 | 0.029156965 |
| 534 | ENSMUSG00000032332 | Col12a1       | 3.472706071 | 1.796060307 | 0.008874548 |

|     |                     |            |             |             |             |
|-----|---------------------|------------|-------------|-------------|-------------|
| 535 | ENSMUSG00000018927  | Ccl6       | 3.470854396 | 1.795290845 | 0.01019007  |
| 536 | ENSMUSG00000027335  | Adra1d     | 3.459552039 | 1.790585242 | 0.037881243 |
| 537 | ENSMUSG00000025701  | Alox5      | 3.459552039 | 1.790585242 | 0.037881243 |
| 538 | ENSMUSG00000026938  | Fcna       | 3.459322325 | 1.790489444 | 0.045980594 |
| 539 | ENSMUSG00000055809  | Dnaaf3     | 3.459322325 | 1.790489444 | 0.045980594 |
| 540 | ENSMUSG00000047180  | Neurl3     | 3.453411331 | 1.788022182 | 0.00936835  |
| 541 | ENSMUSG00000022221  | Ripk3      | 3.448847659 | 1.786114404 | 0.0173463   |
| 542 | ENSMUSG00000002699  | Lcp2       | 3.44284049  | 1.783599341 | 0.015265868 |
| 543 | ENSMUSG00000031740  | Mmp2       | 3.440970919 | 1.782815699 | 0.009539183 |
| 544 | ENSMUSG00000032691  | Nlrp3      | 3.437626005 | 1.781412596 | 0.032991148 |
| 545 | ENSMUSG00000027962  | Vcam1      | 3.424839261 | 1.776036279 | 0.00891606  |
| 546 | ENSMUSG00000006313  | Upk1a      | 3.424252664 | 1.775789157 | 0.010584835 |
| 547 | ENSMUSG00000048644  | Ctxn1      | 3.421303183 | 1.774545956 | 0.012975697 |
| 548 | ENSMUSG00000030867  | Plk1       | 3.415729927 | 1.772193909 | 0.018372291 |
| 549 | ENSMUSG00000026077  | Npas2      | 3.413103831 | 1.771084304 | 0.023144746 |
| 550 | ENSMUSG00000037239  | Spred3     | 3.413103831 | 1.771084304 | 0.023144746 |
| 551 | ENSMUSG00000021356  | Irf4       | 3.412358656 | 1.770769289 | 0.014611613 |
| 552 | ENSMUSG00000022181  | C6         | 3.406841562 | 1.768434855 | 0.032386763 |
| 553 | ENSMUSG00000024675  | Ms4a4c     | 3.399672146 | 1.765395624 | 0.020789946 |
| 554 | ENSMUSG00000013584  | Aldh1a2    | 3.396211998 | 1.763926517 | 0.010448905 |
| 555 | ENSMUSG00000029651  | Mtus2      | 3.387686157 | 1.760300226 | 0.04221484  |
| 556 | ENSMUSG00000035692  | Isg15      | 3.387112354 | 1.760055843 | 0.009734716 |
| 557 | ENSMUSG00000038642  | Ctss       | 3.385362347 | 1.759310259 | 0.009397563 |
| 558 | ENSMUSG00000020865  | Abcc3      | 3.382458144 | 1.758072082 | 0.010984312 |
| 559 | ENSMUSG00000039683  | Sdk1       | 3.370069721 | 1.752778439 | 0.013232827 |
| 560 | ENSMUSG00000049436  | Upk1b      | 3.362437697 | 1.749507536 | 0.01159309  |
| 561 | ENSMUSG000000113101 | AC118222.2 | 3.360875532 | 1.748837114 | 0.045980594 |
| 562 | ENSMUSG00000029378  | Areg       | 3.360875532 | 1.748837114 | 0.045980594 |
| 563 | ENSMUSG00000091705  | H2-Q2      | 3.34957122  | 1.743976427 | 0.013078564 |
| 564 | ENSMUSG00000037129  | Tmprss13   | 3.346509711 | 1.742657201 | 0.031274573 |
| 565 | ENSMUSG00000033595  | Lgi3       | 3.342560345 | 1.740953606 | 0.043422342 |
| 566 | ENSMUSG00000023067  | Cdkn1a     | 3.336289304 | 1.738244397 | 0.009798617 |
| 567 | ENSMUSG00000001930  | Vwf        | 3.333329873 | 1.736964097 | 0.011385492 |
| 568 | ENSMUSG00000004951  | Hspb1      | 3.333090303 | 1.736860405 | 0.009892932 |
| 569 | ENSMUSG00000036067  | Slc2a6     | 3.332288693 | 1.736513394 | 0.018360892 |
| 570 | ENSMUSG00000042622  | Maff       | 3.320352548 | 1.731336432 | 0.011774353 |
| 571 | ENSMUSG00000027859  | Ngf        | 3.304755287 | 1.724543446 | 0.013134284 |
| 572 | ENSMUSG00000037580  | Gch1       | 3.302835644 | 1.72370518  | 0.019356079 |
| 573 | ENSMUSG00000028539  | Artn       | 3.295942397 | 1.720691029 | 0.02534492  |
| 574 | ENSMUSG00000029811  | Aoc1       | 3.292595231 | 1.719225168 | 0.011590707 |
| 575 | ENSMUSG00000030107  | Usp18      | 3.291373134 | 1.71868959  | 0.012976447 |
| 576 | ENSMUSG00000033880  | Lgals3bp   | 3.288333615 | 1.717356674 | 0.010634826 |
| 577 | ENSMUSG00000030263  | Lrmp       | 3.287120929 | 1.716824532 | 0.023357485 |
| 578 | ENSMUSG00000068014  | Gm14648    | 3.281823411 | 1.714497612 | 0.045980594 |
| 579 | ENSMUSG00000050370  | Ch25h      | 3.276422564 | 1.712121435 | 0.020477951 |
| 580 | ENSMUSG00000022037  | Clu        | 3.274097792 | 1.711097413 | 0.010838045 |
| 581 | ENSMUSG00000053398  | Phgdh      | 3.265928747 | 1.707493316 | 0.011474229 |
| 582 | ENSMUSG00000052160  | Pld4       | 3.26568892  | 1.707387371 | 0.012270838 |
| 583 | ENSMUSG00000003484  | Cyp4f18    | 3.261022864 | 1.705324556 | 0.020061512 |

|     |                     |          |             |             |             |
|-----|---------------------|----------|-------------|-------------|-------------|
| 584 | ENSMUSG00000037849  | Ifi206   | 3.26090932  | 1.705274323 | 0.027432168 |
| 585 | ENSMUSG00000090210  | Itga10   | 3.248894405 | 1.699948854 | 0.04127558  |
| 586 | ENSMUSG00000028076  | Cd1d1    | 3.237510773 | 1.694884993 | 0.021071022 |
| 587 | ENSMUSG00000066515  | Klk1b3   | 3.228453039 | 1.690843042 | 0.03249639  |
| 588 | ENSMUSG00000040276  | Pacsin1  | 3.226439884 | 1.689943145 | 0.029312361 |
| 589 | ENSMUSG00000049866  | Arl4c    | 3.226340806 | 1.689898842 | 0.01281755  |
| 590 | ENSMUSG00000057191  | AB124611 | 3.219105538 | 1.686659876 | 0.026702842 |
| 591 | ENSMUSG00000056596  | Trnp1    | 3.215260477 | 1.684935619 | 0.022854384 |
| 592 | ENSMUSG00000028047  | Thbs3    | 3.214476495 | 1.684583802 | 0.021524967 |
| 593 | ENSMUSG00000063415  | Cyp26b1  | 3.212043575 | 1.683491465 | 0.013102393 |
| 594 | ENSMUSG00000073787  | Gm10575  | 3.197012718 | 1.676724483 | 0.049529827 |
| 595 | ENSMUSG00000019122  | Ccl9     | 3.189815268 | 1.673472875 | 0.017248164 |
| 596 | ENSMUSG00000024672  | Ms4a7    | 3.186651153 | 1.672041094 | 0.021869649 |
| 597 | ENSMUSG00000026574  | Dpt      | 3.186178343 | 1.671827023 | 0.023137346 |
| 598 | ENSMUSG00000020901  | Pik3r5   | 3.184308022 | 1.670979896 | 0.024359911 |
| 599 | ENSMUSG00000024972  | Lgals12  | 3.183468775 | 1.670599613 | 0.02804266  |
| 600 | ENSMUSG00000022346  | Myc      | 3.181744836 | 1.669818142 | 0.014538686 |
| 601 | ENSMUSG00000074676  | Foxs1    | 3.178890522 | 1.668523332 | 0.035334578 |
| 602 | ENSMUSG00000042734  | Ttc9     | 3.175431877 | 1.66695282  | 0.042908497 |
| 603 | ENSMUSG00000030116  | Mfap5    | 3.173898224 | 1.666255867 | 0.049741613 |
| 604 | ENSMUSG00000058163  | Gm5431   | 3.171168654 | 1.665014607 | 0.042908497 |
| 605 | ENSMUSG00000005087  | Cd44     | 3.166165986 | 1.662736891 | 0.017729416 |
| 606 | ENSMUSG00000032271  | Nnmt     | 3.164327893 | 1.661899102 | 0.021680391 |
| 607 | ENSMUSG000000105247 | Gm42519  | 3.162118082 | 1.660891243 | 0.046667979 |
| 608 | ENSMUSG00000029260  | Ugt2b34  | 3.151615049 | 1.656091329 | 0.014829799 |
| 609 | ENSMUSG00000075296  | Aldh3b2  | 3.151231585 | 1.655915782 | 0.026075263 |
| 610 | ENSMUSG00000053318  | Slamf8   | 3.144646549 | 1.652897871 | 0.032962144 |
| 611 | ENSMUSG00000001025  | S100a6   | 3.142484455 | 1.651905608 | 0.013934076 |
| 612 | ENSMUSG00000073489  | Ifi204   | 3.141413822 | 1.651414003 | 0.019361923 |
| 613 | ENSMUSG00000022951  | Rcan1    | 3.137522984 | 1.649626028 | 0.013999886 |
| 614 | ENSMUSG00000063713  | Klk1b24  | 3.130319255 | 1.646309802 | 0.035334578 |
| 615 | ENSMUSG00000043263  | Ifi209   | 3.129328005 | 1.645852885 | 0.035334578 |
| 616 | ENSMUSG00000031934  | Panx1    | 3.120710266 | 1.64187442  | 0.027317469 |
| 617 | ENSMUSG00000043333  | Rhbd12   | 3.114528684 | 1.639013859 | 0.047335885 |
| 618 | ENSMUSG00000097183  | Gm17501  | 3.114528684 | 1.639013859 | 0.047335885 |
| 619 | ENSMUSG00000099974  | Bcl2a1d  | 3.106943022 | 1.635495784 | 0.035334578 |
| 620 | ENSMUSG00000049130  | C5ar1    | 3.103351919 | 1.633827307 | 0.028604508 |
| 621 | ENSMUSG00000097789  | Gm2115   | 3.101377591 | 1.632909184 | 0.025144289 |
| 622 | ENSMUSG00000030798  | Cd37     | 3.096664298 | 1.630714992 | 0.026687294 |
| 623 | ENSMUSG00000072188  | Gm10354  | 3.093652001 | 1.62931092  | 0.044841285 |
| 624 | ENSMUSG00000006219  | Fblim1   | 3.09293073  | 1.628974523 | 0.016736964 |
| 625 | ENSMUSG00000040037  | Negr1    | 3.092381079 | 1.628718116 | 0.033540063 |
| 626 | ENSMUSG00000064080  | Fbln2    | 3.079899926 | 1.622883475 | 0.019985504 |
| 627 | ENSMUSG00000021367  | Edn1     | 3.079881092 | 1.622874652 | 0.021811079 |
| 628 | ENSMUSG00000055541  | Lair1    | 3.07670007  | 1.62138381  | 0.027505846 |
| 629 | ENSMUSG00000021701  | Plk2     | 3.073751976 | 1.620000757 | 0.016642891 |
| 630 | ENSMUSG00000049999  | Ppp1r3d  | 3.063573794 | 1.615215603 | 0.04970526  |
| 631 | ENSMUSG00000053647  | Gper1    | 3.06235526  | 1.614641658 | 0.028543885 |
| 632 | ENSMUSG00000037548  | H2-DMb2  | 3.06160901  | 1.614290052 | 0.018241072 |

|     |                    |            |             |             |             |
|-----|--------------------|------------|-------------|-------------|-------------|
| 633 | ENSMUSG00000034652 | Cd300a     | 3.05784727  | 1.61251635  | 0.027952483 |
| 634 | ENSMUSG00000068893 | Spr2a2     | 3.056650091 | 1.61195141  | 0.017205346 |
| 635 | ENSMUSG00000028786 | Tmem54     | 3.052120914 | 1.609812118 | 0.024490583 |
| 636 | ENSMUSG00000039239 | Tgfb2      | 3.051434874 | 1.6094878   | 0.033099203 |
| 637 | ENSMUSG00000034792 | Gna15      | 3.048291758 | 1.608000993 | 0.036231613 |
| 638 | ENSMUSG00000049511 | Htr1b      | 3.047395638 | 1.607576815 | 0.031634628 |
| 639 | ENSMUSG00000063011 | Msln       | 3.043316442 | 1.605644352 | 0.032120652 |
| 640 | ENSMUSG00000040483 | Xaf1       | 3.037997863 | 1.603120855 | 0.01913195  |
| 641 | ENSMUSG00000054630 | Ugt2b5     | 3.028410718 | 1.598560879 | 0.032315176 |
| 642 | ENSMUSG00000040552 | C3ar1      | 3.027181426 | 1.597975142 | 0.024856603 |
| 643 | ENSMUSG00000022665 | Ccdc80     | 3.026724475 | 1.597757352 | 0.019332818 |
| 644 | ENSMUSG00000044313 | Mab21l3    | 3.018574051 | 1.593867194 | 0.023061013 |
| 645 | ENSMUSG00000031103 | Elf4       | 3.004755401 | 1.587247555 | 0.021042568 |
| 646 | ENSMUSG00000073802 | Cdkn2b     | 3.00395708  | 1.5868642   | 0.022415089 |
| 647 | ENSMUSG00000015452 | Ager       | 3.002425609 | 1.586128501 | 0.039208206 |
| 648 | ENSMUSG00000041431 | Ccnb1      | 2.993109949 | 1.581645276 | 0.043849144 |
| 649 | ENSMUSG00000104444 | Gm33051    | 2.985444394 | 1.577945698 | 0.026877485 |
| 650 | ENSMUSG00000038893 | Fam117a    | 2.984333188 | 1.577408615 | 0.020485599 |
| 651 | ENSMUSG00000016477 | E2f3       | 2.983616533 | 1.577062126 | 0.028963406 |
| 652 | ENSMUSG00000027750 | Postn      | 2.966312287 | 1.56867049  | 0.041842087 |
| 653 | ENSMUSG00000037731 | Themis2    | 2.966061056 | 1.568548296 | 0.027178162 |
| 654 | ENSMUSG00000056708 | Ier5       | 2.963473893 | 1.567289348 | 0.020360915 |
| 655 | ENSMUSG00000039956 | Mrap       | 2.958100518 | 1.564671077 | 0.03756814  |
| 656 | ENSMUSG00000003283 | Hck        | 2.956218765 | 1.563753035 | 0.026457313 |
| 657 | ENSMUSG00000095585 | CR974586.3 | 2.955409201 | 1.563357897 | 0.043079437 |
| 658 | ENSMUSG00000112508 | 2-Sep      | 2.953924228 | 1.56263282  | 0.020943796 |
| 659 | ENSMUSG00000036905 | C1qb       | 2.947641856 | 1.559561245 | 0.020179441 |
| 660 | ENSMUSG00000092470 | Gm20518    | 2.939670118 | 1.555654269 | 0.031687758 |
| 661 | ENSMUSG00000038059 | Smim3      | 2.931411331 | 1.551595419 | 0.025383523 |
| 662 | ENSMUSG00000005465 | Il27ra     | 2.930569461 | 1.551181033 | 0.040976356 |
| 663 | ENSMUSG00000034855 | Cxcl10     | 2.924714908 | 1.548296002 | 0.021813992 |
| 664 | ENSMUSG00000089929 | Bcl2a1b    | 2.921943963 | 1.54692851  | 0.044665414 |
| 665 | ENSMUSG00000000957 | Mmp14      | 2.918262482 | 1.545109652 | 0.023051361 |
| 666 | ENSMUSG00000031880 | Rrad       | 2.918206275 | 1.545081864 | 0.025238389 |
| 667 | ENSMUSG00000015396 | Cd83       | 2.905050918 | 1.538563451 | 0.029117431 |
| 668 | ENSMUSG00000020120 | Plek       | 2.901289901 | 1.536694459 | 0.041742789 |
| 669 | ENSMUSG00000027908 | Tchhl1     | 2.894213769 | 1.533171484 | 0.038010725 |
| 670 | ENSMUSG00000087379 | Gm13849    | 2.889517413 | 1.530828564 | 0.027306708 |
| 671 | ENSMUSG00000032034 | Kcnj5      | 2.871934475 | 1.522022833 | 0.049539603 |
| 672 | ENSMUSG00000028270 | Gbp2       | 2.870093915 | 1.521097946 | 0.02389062  |
| 673 | ENSMUSG00000041548 | Hspb8      | 2.866561476 | 1.519321219 | 0.024776278 |
| 674 | ENSMUSG00000002111 | Spi1       | 2.863716887 | 1.517888872 | 0.027500645 |
| 675 | ENSMUSG00000037447 | Arid5a     | 2.859145997 | 1.51558429  | 0.030908574 |
| 676 | ENSMUSG00000002104 | Rapsn      | 2.852173407 | 1.512061698 | 0.030925032 |
| 677 | ENSMUSG00000020911 | Krt19      | 2.849765516 | 1.510843217 | 0.025923326 |
| 678 | ENSMUSG00000091387 | Gcnt4      | 2.849516793 | 1.510717295 | 0.046095719 |
| 679 | ENSMUSG00000041773 | Enc1       | 2.848628013 | 1.51026724  | 0.027565362 |
| 680 | ENSMUSG00000036718 | Micall2    | 2.841467883 | 1.506636409 | 0.031921083 |
| 681 | ENSMUSG00000074896 | Ifit3      | 2.829912687 | 1.500757541 | 0.02499923  |

|     |                    |          |             |             |             |
|-----|--------------------|----------|-------------|-------------|-------------|
| 682 | ENSMUSG00000030411 | Nova2    | 2.827598532 | 1.499577298 | 0.037353379 |
| 683 | ENSMUSG00000027555 | Car13    | 2.817917338 | 1.494629292 | 0.036008792 |
| 684 | ENSMUSG00000044583 | Tlr7     | 2.817706911 | 1.494521555 | 0.045005041 |
| 685 | ENSMUSG00000036887 | C1qa     | 2.797026749 | 1.483894051 | 0.026682918 |
| 686 | ENSMUSG00000078162 | Gm2574   | 2.79575321  | 1.483237015 | 0.041853268 |
| 687 | ENSMUSG00000103567 | Pcdhga5  | 2.793139257 | 1.481887504 | 0.045252558 |
| 688 | ENSMUSG00000033420 | Antxr1   | 2.79249431  | 1.481554341 | 0.032970568 |
| 689 | ENSMUSG00000061232 | H2-K1    | 2.781808269 | 1.476022988 | 0.026913157 |
| 690 | ENSMUSG00000058297 | Spock2   | 2.779453617 | 1.474801307 | 0.041318299 |
| 691 | ENSMUSG00000028268 | Gbp3     | 2.776323125 | 1.473175487 | 0.031177807 |
| 692 | ENSMUSG00000052684 | Jun      | 2.775410552 | 1.472701198 | 0.027549695 |
| 693 | ENSMUSG00000038456 | Dennd2a  | 2.755350067 | 1.462235625 | 0.03358856  |
| 694 | ENSMUSG00000023908 | Pkmyt1   | 2.752052293 | 1.460507884 | 0.049237215 |
| 695 | ENSMUSG00000042246 | Tmc7     | 2.738817588 | 1.453553182 | 0.046500719 |
| 696 | ENSMUSG00000039232 | Stx11    | 2.738621034 | 1.453449642 | 0.044764776 |
| 697 | ENSMUSG00000002055 | Spag5    | 2.732463898 | 1.450202435 | 0.037201759 |
| 698 | ENSMUSG00000023247 | Guca2a   | 2.731960713 | 1.449936737 | 0.037265518 |
| 699 | ENSMUSG00000076615 | Ighg3    | 2.731876888 | 1.44989247  | 0.033935287 |
| 700 | ENSMUSG00000037035 | Inhbb    | 2.728449034 | 1.448081095 | 0.047622895 |
| 701 | ENSMUSG00000062488 | Ifit3b   | 2.726703731 | 1.447157953 | 0.032402153 |
| 702 | ENSMUSG00000035540 | Gc       | 2.72646555  | 1.447031927 | 0.030097808 |
| 703 | ENSMUSG00000020407 | Upp1     | 2.725628159 | 1.446588757 | 0.032058966 |
| 704 | ENSMUSG00000047281 | Sfn      | 2.724285281 | 1.445877787 | 0.032038836 |
| 705 | ENSMUSG00000036896 | C1qc     | 2.718390028 | 1.442752465 | 0.031512701 |
| 706 | ENSMUSG00000047822 | Angptl8  | 2.717088304 | 1.442061453 | 0.039543949 |
| 707 | ENSMUSG00000020205 | Phlda1   | 2.712061711 | 1.439390007 | 0.035474544 |
| 708 | ENSMUSG00000096847 | Tmem151b | 2.709358528 | 1.437951317 | 0.041556734 |
| 709 | ENSMUSG00000006930 | Hap1     | 2.70719458  | 1.436798585 | 0.040216166 |
| 710 | ENSMUSG00000059089 | Fcgr4    | 2.705924589 | 1.436121634 | 0.035699633 |
| 711 | ENSMUSG00000033777 | Tlr13    | 2.704333133 | 1.435272881 | 0.049918285 |
| 712 | ENSMUSG00000020121 | Srgap1   | 2.703077344 | 1.434602793 | 0.035782336 |
| 713 | ENSMUSG00000033831 | Fgb      | 2.70127374  | 1.433639846 | 0.042988143 |
| 714 | ENSMUSG00000000290 | Itgb2    | 2.699177938 | 1.432520087 | 0.035346577 |
| 715 | ENSMUSG00000078921 | Tgtp2    | 2.699017408 | 1.432434282 | 0.033059499 |
| 716 | ENSMUSG00000045136 | Tubb2b   | 2.698551458 | 1.432185198 | 0.032757113 |
| 717 | ENSMUSG00000052131 | Akr1b7   | 2.695116386 | 1.430347575 | 0.040216166 |
| 718 | ENSMUSG00000031904 | Slc7a6   | 2.692807361 | 1.429111025 | 0.039017823 |
| 719 | ENSMUSG00000070427 | Il18bp   | 2.691867796 | 1.428607558 | 0.036393594 |
| 720 | ENSMUSG00000029298 | Gbp9     | 2.691589685 | 1.428458497 | 0.043422421 |
| 721 | ENSMUSG00000034422 | Parp14   | 2.686637483 | 1.425801667 | 0.034184637 |
| 722 | ENSMUSG00000035835 | Plppr3   | 2.686533327 | 1.425745735 | 0.046653393 |
| 723 | ENSMUSG00000048865 | Arhgap30 | 2.683038191 | 1.42386759  | 0.041226643 |
| 724 | ENSMUSG00000019326 | Aoc3     | 2.680594368 | 1.422552925 | 0.036449484 |
| 725 | ENSMUSG00000000693 | Lox13    | 2.680022839 | 1.422245296 | 0.042840473 |
| 726 | ENSMUSG00000067276 | Capn6    | 2.679237244 | 1.421822336 | 0.045183628 |
| 727 | ENSMUSG00000019850 | Tnfaip3  | 2.675923977 | 1.42003713  | 0.039075885 |
| 728 | ENSMUSG00000024677 | Ms4a6b   | 2.66765838  | 1.415573927 | 0.043515137 |
| 729 | ENSMUSG00000034457 | Eda2r    | 2.659002903 | 1.410885352 | 0.041914107 |
| 730 | ENSMUSG00000026979 | Psd4     | 2.657838031 | 1.410253189 | 0.048252143 |

|     |                    |         |             |             |             |
|-----|--------------------|---------|-------------|-------------|-------------|
| 731 | ENSMUSG00000051790 | Nlgn2   | 2.657541837 | 1.410092404 | 0.039370591 |
| 732 | ENSMUSG00000001123 | Lgals9  | 2.655289069 | 1.408868929 | 0.036382167 |
| 733 | ENSMUSG00000063160 | Numb1   | 2.654298071 | 1.408330391 | 0.043060184 |
| 734 | ENSMUSG00000015745 | Plekho1 | 2.654245722 | 1.408301937 | 0.03581525  |
| 735 | ENSMUSG00000060063 | Alox5ap | 2.648808954 | 1.405343793 | 0.041731748 |
| 736 | ENSMUSG00000072620 | Slfn2   | 2.641651408 | 1.401440101 | 0.037653628 |
| 737 | ENSMUSG00000022875 | Kng1    | 2.630068299 | 1.395100265 | 0.048047321 |
| 738 | ENSMUSG00000045382 | Cxcr4   | 2.617887689 | 1.388403205 | 0.04117146  |
| 739 | ENSMUSG00000027298 | Tyro3   | 2.617285228 | 1.388071156 | 0.044840138 |
| 740 | ENSMUSG00000022602 | Arc     | 2.608615431 | 1.383284274 | 0.040653535 |
| 741 | ENSMUSG00000021556 | Golm1   | 2.606187279 | 1.381940759 | 0.039413628 |
| 742 | ENSMUSG00000056737 | Capg    | 2.603803556 | 1.380620608 | 0.038847831 |
| 743 | ENSMUSG00000025037 | Maoa    | 2.603644102 | 1.380532257 | 0.040450167 |
| 744 | ENSMUSG00000018774 | Cd68    | 2.600878086 | 1.378998776 | 0.044201745 |
| 745 | ENSMUSG00000035778 | Ggta1   | 2.600878086 | 1.378998776 | 0.044201745 |
| 746 | ENSMUSG00000036957 | Lrfn3   | 2.600672994 | 1.378885008 | 0.045306143 |
| 747 | ENSMUSG00000073490 | Ifi207  | 2.59812802  | 1.37747252  | 0.047233419 |
| 748 | ENSMUSG00000020806 | Rhbdf2  | 2.595245527 | 1.375871033 | 0.041585798 |
| 749 | ENSMUSG00000074151 | Nlrc5   | 2.593492144 | 1.374896    | 0.044900211 |
| 750 | ENSMUSG00000027188 | Pamr1   | 2.585494041 | 1.37043998  | 0.04289166  |
| 751 | ENSMUSG00000015652 | Steap1  | 2.583081876 | 1.369093373 | 0.046005384 |
| 752 | ENSMUSG00000022512 | Cldn1   | 2.58307624  | 1.369090225 | 0.042393155 |
| 753 | ENSMUSG00000012705 | Retn    | 2.57608429  | 1.365179799 | 0.04669568  |
| 754 | ENSMUSG00000036894 | Rap2b   | 2.574648394 | 1.364375425 | 0.047073656 |
| 755 | ENSMUSG00000035403 | Crb2    | 2.572116465 | 1.362955969 | 0.046316564 |
| 756 | ENSMUSG00000000078 | Klf6    | 2.565744305 | 1.359377402 | 0.042203497 |
| 757 | ENSMUSG00000048458 | Fam212b | 2.563561872 | 1.358149718 | 0.04776031  |
| 758 | ENSMUSG00000061048 | Cdh3    | 2.563365463 | 1.358039181 | 0.044430605 |
| 759 | ENSMUSG00000050335 | Lgals3  | 2.552461743 | 1.351889338 | 0.042383363 |
| 760 | ENSMUSG00000028583 | Pdpn    | 2.54964482  | 1.350296286 | 0.04561955  |
| 761 | ENSMUSG00000028364 | Tnc     | 2.544341731 | 1.347292453 | 0.045532488 |
| 762 | ENSMUSG00000024338 | Psmb8   | 2.538917609 | 1.344213579 | 0.044241831 |
| 763 | ENSMUSG00000064215 | Ifi27   | 2.525181561 | 1.336387122 | 0.044824701 |
| 764 | ENSMUSG00000078920 | Ifi47   | 2.509311473 | 1.327291559 | 0.049135666 |
| 765 | ENSMUSG00000062991 | Nrg1    | 2.503995416 | 1.324231921 | 0.048816234 |
| 766 | ENSMUSG00000041120 | Nbl1    | 2.502580139 | 1.323416268 | 0.047754653 |
| 767 | ENSMUSG00000090877 | Hspa1b  | 2.49882735  | 1.321251226 | 0.046893303 |
| 768 | ENSMUSG00000018593 | Sparc   | 2.494888397 | 1.318975282 | 0.047250454 |
| 769 | ENSMUSG00000073409 | H2-Q6   | 2.482011375 | 1.311509727 | 0.04864935  |

#### Down-regulated:

| No. | Track_id           | Gene_Name | FC(KO/WT)   | Log2FC(KO/WT) | P value  |
|-----|--------------------|-----------|-------------|---------------|----------|
| 1   | ENSMUSG00000100153 | Gm5601    | 0.000526841 | -10.89034472  | 7.18E-13 |
| 2   | ENSMUSG00000041698 | Slco1a1   | 0.018837614 | -5.730239912  | 1.15E-11 |
| 3   | ENSMUSG00000093769 | Hist2h3c1 | 0.001606278 | -9.282062941  | 1.64E-08 |
| 4   | ENSMUSG00000030359 | Pzp       | 0.053071561 | -4.235917217  | 2.71E-08 |
| 5   | ENSMUSG00000053916 | Nanp      | 0.00200784  | -8.960140041  | 1.12E-07 |
| 6   | ENSMUSG00000094162 | Ccl19-ps3 | 0.002085165 | -8.905622992  | 1.47E-07 |
| 7   | ENSMUSG00000084383 | Gm13370   | 0.002118597 | -8.88267532   | 1.68E-07 |



|    |                    |               |             |              |             |
|----|--------------------|---------------|-------------|--------------|-------------|
| 8  | ENSMUSG00000028571 | Cyp2j13       | 0.073408969 | -3.767899843 | 2.71E-07    |
| 9  | ENSMUSG00000097582 | Gm26527       | 0.067354447 | -3.892082983 | 4.35E-07    |
| 10 | ENSMUSG00000104375 | Gm6300        | 0.002574642 | -8.601412321 | 7.45E-07    |
| 11 | ENSMUSG00000033715 | Akr1c14       | 0.082693626 | -3.596080063 | 9.37E-07    |
| 12 | ENSMUSG00000089675 | Ugt1a8        | 0.082075884 | -3.606897804 | 1.28E-06    |
| 13 | ENSMUSG00000030680 | Pagrla        | 0.076126709 | -3.715453476 | 1.36E-06    |
| 14 | ENSMUSG00000052562 | Slc22a30      | 0.091468495 | -3.45058128  | 1.90E-06    |
| 15 | ENSMUSG00000086156 | Gm15354       | 0.058491126 | -4.095638416 | 2.00E-06    |
| 16 | ENSMUSG00000022366 | Slc22a22      | 0.096461657 | -3.37390059  | 3.39E-06    |
| 17 | ENSMUSG00000063590 | Slc22a28      | 0.099321909 | -3.331744196 | 3.89E-06    |
| 18 | ENSMUSG00000041052 | Slc7a13       | 0.102427797 | -3.287320803 | 4.10E-06    |
| 19 | ENSMUSG00000022877 | Hrg           | 0.08177935  | -3.612119587 | 4.96E-06    |
| 20 | ENSMUSG00000096963 | B230364G03Rik | 0.003399449 | -8.200483422 | 6.32E-06    |
| 21 | ENSMUSG00000092822 | Gm23162       | 0.09500925  | -3.395788217 | 6.63E-06    |
| 22 | ENSMUSG00000032758 | Kap           | 0.109053818 | -3.19688781  | 6.74E-06    |
| 23 | ENSMUSG00000039519 | Cyp7b1        | 0.10897169  | -3.197974713 | 7.56E-06    |
| 24 | ENSMUSG00000028713 | Cyp4b1        | 0.11241105  | -3.153144234 | 8.68E-06    |
| 25 | ENSMUSG00000030935 | Acsn3         | 0.111803722 | -3.160959874 | 8.75E-06    |
| 26 | ENSMUSG00000108511 | Gm44987       | 0.003572315 | -8.128924908 | 9.48E-06    |
| 27 | ENSMUSG00000102683 | Gm37375       | 0.003629554 | -8.105991814 | 9.48E-06    |
| 28 | ENSMUSG00000031725 | Ces1f         | 0.114662697 | -3.124531974 | 1.03E-05    |
| 29 | ENSMUSG00000100426 | Gm4208        | 0.077763259 | -3.684767515 | 1.24E-05    |
| 30 | ENSMUSG00000025479 | Cyp2e1        | 0.119415248 | -3.065941028 | 1.42E-05    |
| 31 | ENSMUSG00000026827 | Gpd2          | 0.11292215  | -3.146599591 | 1.50E-05    |
| 32 | ENSMUSG00000093598 | A730085K08Rik | 0.004119944 | -7.923159603 | 2.25E-05    |
| 33 | ENSMUSG00000105446 | Gm42605       | 0.086118387 | -3.537534884 | 2.32E-05    |
| 34 | ENSMUSG00000103441 | 7530428D23Rik | 0.069420296 | -3.848498664 | 2.33E-05    |
| 35 | ENSMUSG00000078816 | Prkeg         | 0.101711539 | -3.297444731 | 3.46E-05    |
| 36 | ENSMUSG00000079495 | Nat8f6        | 0.134378072 | -2.895630364 | 3.81E-05    |
| 37 | ENSMUSG00000005547 | Cyp2a5        | 0.136716773 | -2.870737846 | 4.20E-05    |
| 38 | ENSMUSG00000107838 | Gm45769       | 0.102783172 | -3.282324021 | 5.74E-05    |
| 39 | ENSMUSG00000022304 | Dpys          | 0.143546206 | -2.800412891 | 8.07E-05    |
| 40 | ENSMUSG00000053852 | Adgrg4        | 0.125595844 | -2.993139372 | 8.59E-05    |
| 41 | ENSMUSG00000061833 | Gm6311        | 0.005072685 | -7.623034817 | 9.64E-05    |
| 42 | ENSMUSG00000031710 | Ucp1          | 0.085292412 | -3.551438798 | 0.000112865 |
| 43 | ENSMUSG00000099146 | 0610031O16Rik | 0.092297353 | -3.437566911 | 0.000124037 |
| 44 | ENSMUSG00000061959 | Ces1e         | 0.155327697 | -2.686612986 | 0.000125917 |
| 45 | ENSMUSG00000051149 | Adnp          | 0.11421837  | -3.130133396 | 0.000136087 |
| 46 | ENSMUSG00000083294 | Gm14957       | 0.122569691 | -3.028325826 | 0.000139731 |
| 47 | ENSMUSG00000070368 | Prok1         | 0.123268617 | -3.020122541 | 0.000157978 |
| 48 | ENSMUSG00000084127 | Gm13169       | 0.005574578 | -7.486921794 | 0.000164799 |
| 49 | ENSMUSG00000003477 | Inmt          | 0.165575838 | -2.594435933 | 0.000180238 |
| 50 | ENSMUSG00000066071 | Cyp4a12a      | 0.163819816 | -2.609818215 | 0.000187084 |
| 51 | ENSMUSG00000026415 | Fcamr         | 0.141534809 | -2.82077118  | 0.000192323 |
| 52 | ENSMUSG00000037053 | Azgp1         | 0.16703228  | -2.581801153 | 0.000199968 |
| 53 | ENSMUSG00000053303 | Slc22a26      | 0.155111833 | -2.688619341 | 0.000207797 |
| 54 | ENSMUSG00000108955 | Gm44775       | 0.104062053 | -3.264484021 | 0.000209973 |
| 55 | ENSMUSG00000006200 | Rhox6         | 0.110382679 | -3.179414292 | 0.000212047 |
| 56 | ENSMUSG00000105906 | Igcl1         | 0.00585388  | -7.416391151 | 0.00021796  |

|     |                    |               |             |              |             |
|-----|--------------------|---------------|-------------|--------------|-------------|
| 57  | ENSMUSG00000057074 | Ces1g         | 0.159100656 | -2.651988307 | 0.000220281 |
| 58  | ENSMUSG00000037477 | Tbx10         | 0.099814803 | -3.324602406 | 0.000228285 |
| 59  | ENSMUSG00000036083 | Slc17a3       | 0.170698799 | -2.550475191 | 0.00022989  |
| 60  | ENSMUSG00000038224 | Serpinf2      | 0.171371195 | -2.544803462 | 0.00024003  |
| 61  | ENSMUSG00000085894 | Gm15832       | 0.006012427 | -7.377836791 | 0.000290613 |
| 62  | ENSMUSG00000057425 | Ugt2b37       | 0.178568882 | -2.485447405 | 0.000333808 |
| 63  | ENSMUSG00000045799 | Gm9800        | 0.057217468 | -4.127400543 | 0.000336207 |
| 64  | ENSMUSG00000012187 | Mogat1        | 0.181870226 | -2.459018715 | 0.000379342 |
| 65  | ENSMUSG00000112713 | AC122301.3    | 0.03772125  | -4.72847872  | 0.000385253 |
| 66  | ENSMUSG00000113789 | AC139941.2    | 0.006486787 | -7.268280135 | 0.000390825 |
| 67  | ENSMUSG00000032854 | Ugt8a         | 0.180653667 | -2.468701557 | 0.000395852 |
| 68  | ENSMUSG00000061906 | Ugt2b38       | 0.185186193 | -2.432951554 | 0.000411974 |
| 69  | ENSMUSG00000099519 | Gm29253       | 0.114648249 | -3.124713771 | 0.000415922 |
| 70  | ENSMUSG00000056162 | Cndp1         | 0.187570749 | -2.414493235 | 0.000501288 |
| 71  | ENSMUSG00000026442 | Nfasc         | 0.169636588 | -2.559480721 | 0.00052965  |
| 72  | ENSMUSG00000043219 | Hoxa6         | 0.006889418 | -7.181402079 | 0.000530405 |
| 73  | ENSMUSG00000021187 | Tc2n          | 0.145889043 | -2.777056562 | 0.000552913 |
| 74  | ENSMUSG00000030945 | Acsn2         | 0.193344146 | -2.370757014 | 0.000555379 |
| 75  | ENSMUSG00000031294 | D630029K05Rik | 0.194037912 | -2.365589536 | 0.00059542  |
| 76  | ENSMUSG00000049152 | Ugt3a2        | 0.200468758 | -2.318550675 | 0.000718067 |
| 77  | ENSMUSG00000040693 | Slco4c1       | 0.193426505 | -2.370142598 | 0.000785903 |
| 78  | ENSMUSG00000028527 | Ak4           | 0.203419567 | -2.297469637 | 0.000805713 |
| 79  | ENSMUSG00000030244 | Gys2          | 0.196266155 | -2.349116685 | 0.00090399  |
| 80  | ENSMUSG00000098975 | Gm27177       | 0.198272637 | -2.334442504 | 0.000909632 |
| 81  | ENSMUSG00000096844 | Igkv6-14      | 0.068017947 | -3.877940721 | 0.000921321 |
| 82  | ENSMUSG00000009115 | Spatc11       | 0.195694598 | -2.353324159 | 0.000921602 |
| 83  | ENSMUSG00000038641 | Akr1d1        | 0.202746658 | -2.302249964 | 0.000970582 |
| 84  | ENSMUSG00000074575 | Kcng1         | 0.140037793 | -2.836111868 | 0.000985149 |
| 85  | ENSMUSG00000024575 | Pde6a         | 0.186382785 | -2.423659484 | 0.000995816 |
| 86  | ENSMUSG00000074919 | Gm10787       | 0.132228582 | -2.918894035 | 0.001002138 |
| 87  | ENSMUSG00000072664 | Ugt3a1        | 0.210547496 | -2.247782377 | 0.001018939 |
| 88  | ENSMUSG00000074254 | Cyp2a4        | 0.211823888 | -2.239062799 | 0.001052009 |
| 89  | ENSMUSG00000035878 | Hykk          | 0.211126551 | -2.243820071 | 0.001058902 |
| 90  | ENSMUSG00000081752 | Gm14680       | 0.156918315 | -2.671914347 | 0.001117054 |
| 91  | ENSMUSG00000091813 | Ces2h         | 0.137950965 | -2.857772545 | 0.001121897 |
| 92  | ENSMUSG00000024866 | Acy3          | 0.213968686 | -2.22452842  | 0.001126164 |
| 93  | ENSMUSG00000000049 | Apoh          | 0.199141818 | -2.328131889 | 0.00121926  |
| 94  | ENSMUSG00000037347 | Chst7         | 0.209974291 | -2.251715398 | 0.00122267  |
| 95  | ENSMUSG00000030004 | Nat8          | 0.218287182 | -2.195700676 | 0.001303092 |
| 96  | ENSMUSG00000022853 | Ehhadh        | 0.219152427 | -2.18999344  | 0.001334494 |
| 97  | ENSMUSG00000024650 | Slc22a6       | 0.220137019 | -2.183526319 | 0.001371124 |
| 98  | ENSMUSG00000071177 | Serpina1d     | 0.22149293  | -2.174667445 | 0.001435735 |
| 99  | ENSMUSG00000090145 | Ugt1a6b       | 0.218142916 | -2.196654467 | 0.001562322 |
| 100 | ENSMUSG00000046178 | Nxph1         | 0.169722365 | -2.558751404 | 0.001568007 |
| 101 | ENSMUSG00000069045 | Ddx3y         | 0.211041119 | -2.244403975 | 0.001620591 |
| 102 | ENSMUSG00000096852 | Cyp2d12       | 0.226474872 | -2.142577105 | 0.001721047 |
| 103 | ENSMUSG00000068457 | Uty           | 0.196700012 | -2.345931051 | 0.001895002 |
| 104 | ENSMUSG00000062410 | Hsd3b3        | 0.229182485 | -2.125431305 | 0.001901619 |
| 105 | ENSMUSG00000046213 | Cym           | 0.145752    | -2.778412416 | 0.001969439 |

|     |                    |               |             |              |             |
|-----|--------------------|---------------|-------------|--------------|-------------|
| 106 | ENSMUSG00000112101 | AC159326.1    | 0.008491732 | -6.879725458 | 0.001996045 |
| 107 | ENSMUSG00000083929 | Gm10600       | 0.008537453 | -6.871978532 | 0.001996045 |
| 108 | ENSMUSG00000097718 | Gm26896       | 0.008780589 | -6.831466518 | 0.001996045 |
| 109 | ENSMUSG00000029482 | Aacs          | 0.231998755 | -2.107811034 | 0.00201336  |
| 110 | ENSMUSG00000095210 | Ighv5-9-1     | 0.12657508  | -2.981934696 | 0.002088451 |
| 111 | ENSMUSG00000083863 | Gm13341       | 0.157067225 | -2.670545932 | 0.00219265  |
| 112 | ENSMUSG00000045871 | Slitrk6       | 0.19030131  | -2.3936426   | 0.00226869  |
| 113 | ENSMUSG00000061825 | Ces2c         | 0.23782013  | -2.072057258 | 0.002309827 |
| 114 | ENSMUSG00000108652 | 0610006L08Rik | 0.22775307  | -2.134457595 | 0.00233637  |
| 115 | ENSMUSG00000109532 | Gm44810       | 0.216928901 | -2.204705819 | 0.002343319 |
| 116 | ENSMUSG00000074469 | Gm15348       | 0.20189941  | -2.3082914   | 0.002359162 |
| 117 | ENSMUSG00000059406 | Tmprss9       | 0.158084406 | -2.661233033 | 0.002378747 |
| 118 | ENSMUSG00000031549 | Ido2          | 0.221793224 | -2.172712805 | 0.002386195 |
| 119 | ENSMUSG00000037953 | A4gnt         | 0.226861373 | -2.14011711  | 0.002390497 |
| 120 | ENSMUSG00000056673 | Kdm5d         | 0.217857294 | -2.198544681 | 0.002407125 |
| 121 | ENSMUSG00000032098 | Treh          | 0.239247431 | -2.063424664 | 0.002489684 |
| 122 | ENSMUSG00000020839 | Tmigdl        | 0.24039657  | -2.056511783 | 0.002497303 |
| 123 | ENSMUSG00000057103 | Nat8fl        | 0.241111441 | -2.052227983 | 0.002518223 |
| 124 | ENSMUSG00000097723 | Gm26848       | 0.131354157 | -2.928466238 | 0.002547333 |
| 125 | ENSMUSG00000020062 | Slc5a8        | 0.242015339 | -2.046829607 | 0.002619993 |
| 126 | ENSMUSG00000021620 | Acot12        | 0.241020072 | -2.052774797 | 0.00263535  |
| 127 | ENSMUSG00000068205 | Macrocl2      | 0.240296012 | -2.057115387 | 0.002661636 |
| 128 | ENSMUSG00000086868 | Gm15883       | 0.233441686 | -2.098865885 | 0.002675369 |
| 129 | ENSMUSG00000109432 | Gm44785       | 0.216864461 | -2.205134445 | 0.002696714 |
| 130 | ENSMUSG00000029695 | Aass          | 0.243883526 | -2.035735788 | 0.002718731 |
| 131 | ENSMUSG00000078650 | G6pc          | 0.245190655 | -2.0280241   | 0.002827828 |
| 132 | ENSMUSG00000110221 | Gm36210       | 0.224830857 | -2.153088046 | 0.002937585 |
| 133 | ENSMUSG00000034875 | Nudtl9        | 0.248014399 | -2.01150421  | 0.003013959 |
| 134 | ENSMUSG00000002769 | Gnmt          | 0.239968284 | -2.059084356 | 0.00308198  |
| 135 | ENSMUSG00000079494 | Nat8f5        | 0.246165549 | -2.022299223 | 0.00309694  |
| 136 | ENSMUSG00000038155 | Gstp2         | 0.236227621 | -2.081750435 | 0.003110598 |
| 137 | ENSMUSG00000094787 | Ighv1-54      | 0.137074446 | -2.866968452 | 0.003118634 |
| 138 | ENSMUSG00000049580 | Tsku          | 0.249315917 | -2.003953106 | 0.003302362 |
| 139 | ENSMUSG00000024694 | Kegl          | 0.253130347 | -1.982047614 | 0.003428643 |
| 140 | ENSMUSG00000006711 | D130043K22Rik | 0.084928584 | -3.557605993 | 0.003567541 |
| 141 | ENSMUSG00000030924 | 2610020H08Rik | 0.19753941  | -2.339787586 | 0.003583287 |
| 142 | ENSMUSG00000021207 | Akr1c21       | 0.258326688 | -1.952731395 | 0.003903564 |
| 143 | ENSMUSG00000021335 | Slc17a1       | 0.258287291 | -1.952951439 | 0.003914502 |
| 144 | ENSMUSG00000055114 | Anxa13        | 0.229779041 | -2.121680884 | 0.003939603 |
| 145 | ENSMUSG00000110750 | AC142113.1    | 0.195582443 | -2.354151224 | 0.003963632 |
| 146 | ENSMUSG00000037254 | Itih2         | 0.245521262 | -2.026080128 | 0.004039036 |
| 147 | ENSMUSG00000058921 | Slc10a5       | 0.210701746 | -2.246725825 | 0.00403928  |
| 148 | ENSMUSG00000026189 | Pecr          | 0.259531125 | -1.946020529 | 0.004043056 |
| 149 | ENSMUSG00000068877 | Selenbp2      | 0.252386604 | -1.986292756 | 0.004058328 |
| 150 | ENSMUSG00000086474 | 9130204K15Rik | 0.009989689 | -6.645344516 | 0.004165659 |
| 151 | ENSMUSG00000094638 | Gm21972       | 0.00987416  | -6.66212624  | 0.004165659 |
| 152 | ENSMUSG00000087041 | Gm16295       | 0.009744134 | -6.681250269 | 0.004165659 |
| 153 | ENSMUSG00000113368 | AC159815.1    | 0.009989689 | -6.645344516 | 0.004165659 |
| 154 | ENSMUSG00000031517 | Gpm6a         | 0.258785852 | -1.950169349 | 0.004188239 |

|     |                    |               |             |              |             |
|-----|--------------------|---------------|-------------|--------------|-------------|
| 155 | ENSMUSG00000069049 | Eif2s3y       | 0.248731527 | -2.007338714 | 0.004301955 |
| 156 | ENSMUSG00000085826 | Gm15638       | 0.255568061 | -1.968220547 | 0.00442853  |
| 157 | ENSMUSG00000027359 | Slc27a2       | 0.264892492 | -1.916521142 | 0.004564964 |
| 158 | ENSMUSG00000027896 | Slc16a4       | 0.262286849 | -1.930782623 | 0.004642459 |
| 159 | ENSMUSG00000104887 | Gm43158       | 0.237376808 | -2.074749108 | 0.004652917 |
| 160 | ENSMUSG00000036764 | Dnajc12       | 0.265841455 | -1.911361999 | 0.004736265 |
| 161 | ENSMUSG00000031481 | Tpte          | 0.157156124 | -2.669729606 | 0.004771142 |
| 162 | ENSMUSG00000086706 | Gm15848       | 0.261436023 | -1.935470155 | 0.005044757 |
| 163 | ENSMUSG00000058914 | Clqtnf3       | 0.267135072 | -1.904358696 | 0.005111728 |
| 164 | ENSMUSG00000024313 | Mep1b         | 0.270159269 | -1.888117912 | 0.005253764 |
| 165 | ENSMUSG00000023914 | Mep1a         | 0.271940733 | -1.87863583  | 0.005382606 |
| 166 | ENSMUSG00000033634 | Nat8f2        | 0.269885306 | -1.889581662 | 0.005545546 |
| 167 | ENSMUSG00000067547 | Gm7666        | 0.266125313 | -1.909822354 | 0.00565405  |
| 168 | ENSMUSG00000048572 | Tmem252       | 0.274493935 | -1.86515382  | 0.005731846 |
| 169 | ENSMUSG00000078879 | Zfp973        | 0.166989773 | -2.582168346 | 0.005759502 |
| 170 | ENSMUSG00000021416 | Eci3          | 0.274565717 | -1.864776597 | 0.005772688 |
| 171 | ENSMUSG00000097706 | E030037K01Rik | 0.11792356  | -3.084076105 | 0.005858968 |
| 172 | ENSMUSG00000061742 | Slc22a12      | 0.276163001 | -1.856408047 | 0.005921144 |
| 173 | ENSMUSG00000079015 | Serpina1c     | 0.260767695 | -1.939162943 | 0.005943413 |
| 174 | ENSMUSG00000109093 | Gm19950       | 0.276386708 | -1.855239858 | 0.006034251 |
| 175 | ENSMUSG00000010651 | Acaa1b        | 0.277454614 | -1.849676302 | 0.006123966 |
| 176 | ENSMUSG00000022244 | Amacr         | 0.27720942  | -1.850951814 | 0.006135971 |
| 177 | ENSMUSG00000100621 | Gm28374       | 0.011290351 | -6.46876585  | 0.006149306 |
| 178 | ENSMUSG00000097811 | 2810425M01Rik | 0.01138298  | -6.456977851 | 0.006149306 |
| 179 | ENSMUSG00000112972 | AC156632.1    | 0.011336476 | -6.46288389  | 0.006149306 |
| 180 | ENSMUSG00000104392 | Gm37962       | 0.010977692 | -6.50928148  | 0.006149306 |
| 181 | ENSMUSG00000025815 | Dhtkd1        | 0.27324621  | -1.871726608 | 0.006315162 |
| 182 | ENSMUSG00000029193 | Cckar         | 0.276455758 | -1.854879474 | 0.006405755 |
| 183 | ENSMUSG00000097503 | 3110045C21Rik | 0.266506389 | -1.907757976 | 0.006498188 |
| 184 | ENSMUSG00000032066 | Bco2          | 0.269079113 | -1.893897686 | 0.006538785 |
| 185 | ENSMUSG00000039783 | Kmo           | 0.280043354 | -1.836277903 | 0.006640231 |
| 186 | ENSMUSG00000078552 | Dcdc2b        | 0.174380318 | -2.519690882 | 0.006664909 |
| 187 | ENSMUSG00000041708 | Mpped1        | 0.25843206  | -1.952143041 | 0.006779749 |
| 188 | ENSMUSG00000021384 | Susd3         | 0.281092505 | -1.83088311  | 0.006793046 |
| 189 | ENSMUSG00000031958 | Ldhd          | 0.282492889 | -1.823713543 | 0.006806285 |
| 190 | ENSMUSG00000098747 | Gm27216       | 0.275199363 | -1.861450965 | 0.006937552 |
| 191 | ENSMUSG00000087405 | Gm14232       | 0.270653893 | -1.885478956 | 0.006941786 |
| 192 | ENSMUSG00000042988 | Notum         | 0.276584874 | -1.854205833 | 0.007137581 |
| 193 | ENSMUSG00000076680 | Ighv6-6       | 0.099818761 | -3.324545191 | 0.00753089  |
| 194 | ENSMUSG00000109628 | BC024386      | 0.28337526  | -1.819214285 | 0.007558167 |
| 195 | ENSMUSG00000024766 | Lipo3         | 0.282097823 | -1.825732563 | 0.007750506 |
| 196 | ENSMUSG00000070530 | Wfdc16        | 0.264779485 | -1.917136748 | 0.007815134 |
| 197 | ENSMUSG00000037762 | Slc16a9       | 0.28986819  | -1.786531074 | 0.008169703 |
| 198 | ENSMUSG00000040413 | Timd2         | 0.288894623 | -1.791384741 | 0.008170869 |
| 199 | ENSMUSG00000090124 | Ugt1a7c       | 0.291317729 | -1.77933459  | 0.008241611 |
| 200 | ENSMUSG00000113529 | AC159649.3    | 0.222627166 | -2.167298449 | 0.008242678 |
| 201 | ENSMUSG00000076532 | Igkv4-91      | 0.249308884 | -2.003993799 | 0.008374124 |
| 202 | ENSMUSG00000025936 | Gm4956        | 0.26675692  | -1.906402397 | 0.008404163 |
| 203 | ENSMUSG00000024757 | Slc22a19      | 0.290563583 | -1.783074195 | 0.008416676 |

|     |                    |               |             |              |             |
|-----|--------------------|---------------|-------------|--------------|-------------|
| 204 | ENSMUSG00000026368 | F13b          | 0.290485155 | -1.783463655 | 0.00845218  |
| 205 | ENSMUSG00000037686 | Aspg          | 0.289881798 | -1.786463348 | 0.008514062 |
| 206 | ENSMUSG00000005980 | Dnase1        | 0.293922543 | -1.766492079 | 0.008640753 |
| 207 | ENSMUSG00000033610 | Pank1         | 0.294108783 | -1.765578227 | 0.008806973 |
| 208 | ENSMUSG00000051147 | Nat2          | 0.283659844 | -1.817766164 | 0.009059783 |
| 209 | ENSMUSG00000002076 | Hsf2bp        | 0.286088523 | -1.805466473 | 0.009096837 |
| 210 | ENSMUSG00000085694 | Gm14967       | 0.151190894 | -2.725556841 | 0.00910829  |
| 211 | ENSMUSG00000052520 | Cyp2j5        | 0.296841601 | -1.752234801 | 0.009169607 |
| 212 | ENSMUSG00000032418 | Me1           | 0.296778563 | -1.752541209 | 0.009194941 |
| 213 | ENSMUSG00000112935 | AC192616.1    | 0.012182575 | -6.359037032 | 0.009223959 |
| 214 | ENSMUSG00000081895 | Rpl17-ps10    | 0.012222822 | -6.354278796 | 0.009223959 |
| 215 | ENSMUSG00000108599 | Gm10616       | 0.012182575 | -6.359037032 | 0.009223959 |
| 216 | ENSMUSG00000085944 | 1700003D09Rik | 0.012182575 | -6.359037032 | 0.009223959 |
| 217 | ENSMUSG00000054822 | 1700041G16Rik | 0.012182575 | -6.359037032 | 0.009223959 |
| 218 | ENSMUSG00000044125 | 9530080O11Rik | 0.012182575 | -6.359037032 | 0.009223959 |
| 219 | ENSMUSG00000023473 | Celsr3        | 0.012182575 | -6.359037032 | 0.009223959 |
| 220 | ENSMUSG00000056973 | Ces1d         | 0.296921246 | -1.751847766 | 0.009270581 |
| 221 | ENSMUSG00000055452 | Gm7353        | 0.205144826 | -2.285285327 | 0.009323198 |
| 222 | ENSMUSG00000090486 | BC035947      | 0.296643053 | -1.753200098 | 0.00942177  |
| 223 | ENSMUSG00000102440 | Pcdhga9       | 0.188256347 | -2.409229592 | 0.009435984 |
| 224 | ENSMUSG00000071178 | Serpina1b     | 0.294206619 | -1.765098393 | 0.00945837  |
| 225 | ENSMUSG00000028979 | Masp2         | 0.106014453 | -3.237667134 | 0.009774911 |
| 226 | ENSMUSG00000042179 | Pnliprp1      | 0.106014453 | -3.237667134 | 0.009774911 |
| 227 | ENSMUSG00000020774 | Aspa          | 0.298655685 | -1.743444911 | 0.009942317 |
| 228 | ENSMUSG00000107516 | Gm44244       | 0.241234835 | -2.051489845 | 0.009974628 |
| 229 | ENSMUSG00000109849 | Gm45645       | 0.241234835 | -2.051489845 | 0.009974628 |
| 230 | ENSMUSG00000055137 | Sugct         | 0.300207093 | -1.735970029 | 0.010034017 |
| 231 | ENSMUSG00000104607 | Gm43202       | 0.260319977 | -1.941642065 | 0.010088656 |
| 232 | ENSMUSG00000040170 | Fmo2          | 0.301813999 | -1.728268371 | 0.01018004  |
| 233 | ENSMUSG00000089989 | Gm45713       | 0.112182467 | -3.15608088  | 0.010215054 |
| 234 | ENSMUSG00000090175 | Ugt1a9        | 0.297863407 | -1.747277198 | 0.010358142 |
| 235 | ENSMUSG00000031441 | Atp11a        | 0.303104578 | -1.722112451 | 0.010383412 |
| 236 | ENSMUSG00000025911 | Adhfe1        | 0.304580194 | -1.715105965 | 0.010767504 |
| 237 | ENSMUSG00000096917 | 2500002B13Rik | 0.278061735 | -1.846522869 | 0.010902479 |
| 238 | ENSMUSG00000063730 | Hsd3b2        | 0.304111508 | -1.717327684 | 0.010906494 |
| 239 | ENSMUSG00000063796 | Slc22a8       | 0.305972627 | -1.708525502 | 0.010961139 |
| 240 | ENSMUSG00000042102 | Dmgdh         | 0.305569712 | -1.710426545 | 0.011031229 |
| 241 | ENSMUSG00000024644 | Cndp2         | 0.30653873  | -1.705858729 | 0.011066374 |
| 242 | ENSMUSG00000037348 | Paqr7         | 0.305476023 | -1.71086895  | 0.011207757 |
| 243 | ENSMUSG00000022679 | Mpv17l        | 0.307134016 | -1.703059789 | 0.011255528 |
| 244 | ENSMUSG00000099669 | Gm29012       | 0.275322759 | -1.860804221 | 0.011376879 |
| 245 | ENSMUSG00000097658 | Gm16755       | 0.172937164 | -2.531680163 | 0.01143183  |
| 246 | ENSMUSG00000047528 | Als2cr12      | 0.232617776 | -2.103966749 | 0.01144599  |
| 247 | ENSMUSG00000025059 | Gk            | 0.308063923 | -1.698698353 | 0.011491956 |
| 248 | ENSMUSG00000051262 | Nat8f3        | 0.306257644 | -1.70718224  | 0.011518257 |
| 249 | ENSMUSG00000102095 | C730036E19Rik | 0.30220086  | -1.72642033  | 0.011596415 |
| 250 | ENSMUSG00000042118 | Bhmt2         | 0.308224172 | -1.697948088 | 0.011725947 |
| 251 | ENSMUSG00000097930 | C330002G04Rik | 0.202785626 | -2.301972701 | 0.012065199 |
| 252 | ENSMUSG00000108763 | Gm36028       | 0.279028883 | -1.84151363  | 0.01235326  |

|     |                    |               |             |              |             |
|-----|--------------------|---------------|-------------|--------------|-------------|
| 253 | ENSMUSG00000023262 | Acy1          | 0.313601101 | -1.672997472 | 0.012830068 |
| 254 | ENSMUSG00000066097 | Cyp2j11       | 0.314109948 | -1.670658462 | 0.012987066 |
| 255 | ENSMUSG00000060317 | Acnat2        | 0.314890983 | -1.667075648 | 0.013021507 |
| 256 | ENSMUSG00000028132 | Tmem56        | 0.300547103 | -1.73433698  | 0.013045267 |
| 257 | ENSMUSG00000035699 | Slc51a        | 0.313339974 | -1.674199265 | 0.013148654 |
| 258 | ENSMUSG00000010122 | Slc47a1       | 0.3158664   | -1.662613614 | 0.013198477 |
| 259 | ENSMUSG00000038843 | Gcnt1         | 0.315609257 | -1.663788574 | 0.013202827 |
| 260 | ENSMUSG00000106365 | Gm43568       | 0.22039533  | -2.181834437 | 0.01320914  |
| 261 | ENSMUSG00000030283 | St8sia1       | 0.314425485 | -1.669209937 | 0.013571778 |
| 262 | ENSMUSG00000104340 | Gm10522       | 0.227417166 | -2.136586936 | 0.014006507 |
| 263 | ENSMUSG00000087367 | Gm15491       | 0.013786542 | -6.180595516 | 0.014078675 |
| 264 | ENSMUSG00000091199 | Gm2619        | 0.014066082 | -6.15163565  | 0.014078675 |
| 265 | ENSMUSG00000073415 | Gm10501       | 0.012935025 | -6.272573362 | 0.014078675 |
| 266 | ENSMUSG00000070025 | Gm10284       | 0.013291276 | -6.233376522 | 0.014078675 |
| 267 | ENSMUSG00000020805 | Slc13a5       | 0.013684558 | -6.191307327 | 0.014078675 |
| 268 | ENSMUSG00000024673 | Ms4a1         | 0.013684558 | -6.191307327 | 0.014078675 |
| 269 | ENSMUSG00000039095 | En2           | 0.013684558 | -6.191307327 | 0.014078675 |
| 270 | ENSMUSG00000026357 | Rgs18         | 0.013684558 | -6.191307327 | 0.014078675 |
| 271 | ENSMUSG00000056300 | Zfp981        | 0.013684558 | -6.191307327 | 0.014078675 |
| 272 | ENSMUSG00000085830 | Grin1os       | 0.013684558 | -6.191307327 | 0.014078675 |
| 273 | ENSMUSG00000095975 | Cphx1         | 0.013684558 | -6.191307327 | 0.014078675 |
| 274 | ENSMUSG00000109473 | B930025P03Rik | 0.013684558 | -6.191307327 | 0.014078675 |
| 275 | ENSMUSG00000112641 | AC160411.1    | 0.013684558 | -6.191307327 | 0.014078675 |
| 276 | ENSMUSG00000044556 | Tex38         | 0.013684558 | -6.191307327 | 0.014078675 |
| 277 | ENSMUSG00000085023 | Gm12744       | 0.303968189 | -1.718007747 | 0.014138335 |
| 278 | ENSMUSG00000044429 | Cryga         | 0.104074245 | -3.264315004 | 0.014145884 |
| 279 | ENSMUSG00000038704 | Aspdh         | 0.318294168 | -1.651567372 | 0.014292285 |
| 280 | ENSMUSG00000024039 | Cbs           | 0.319973245 | -1.643976819 | 0.014317606 |
| 281 | ENSMUSG00000030523 | Trpm1         | 0.138396581 | -2.853119787 | 0.014413706 |
| 282 | ENSMUSG00000027887 | Syp12         | 0.318275072 | -1.651653927 | 0.014519298 |
| 283 | ENSMUSG00000074207 | Adhl          | 0.322203883 | -1.633954215 | 0.014772535 |
| 284 | ENSMUSG00000022613 | Miox          | 0.322536554 | -1.632465422 | 0.014814869 |
| 285 | ENSMUSG00000001155 | Ftcd          | 0.316708275 | -1.658773533 | 0.014870588 |
| 286 | ENSMUSG00000034612 | Chst11        | 0.31878976  | -1.649322808 | 0.014921996 |
| 287 | ENSMUSG00000017718 | Afmid         | 0.320688075 | -1.640757389 | 0.01502129  |
| 288 | ENSMUSG00000040966 | Slc22a2       | 0.324666029 | -1.622971658 | 0.015458986 |
| 289 | ENSMUSG00000048022 | Tmem229a      | 0.325760553 | -1.61811618  | 0.015926592 |
| 290 | ENSMUSG00000108435 | Gm45051       | 0.319485741 | -1.646176551 | 0.01636984  |
| 291 | ENSMUSG00000050164 | Mchr1         | 0.295008451 | -1.761171811 | 0.016575526 |
| 292 | ENSMUSG00000023044 | Csad          | 0.328424406 | -1.606366753 | 0.016589228 |
| 293 | ENSMUSG00000104459 | Gm37824       | 0.294527002 | -1.763528189 | 0.016724661 |
| 294 | ENSMUSG00000107785 | Gm45083       | 0.218318211 | -2.195495618 | 0.016810069 |
| 295 | ENSMUSG00000074435 | Smcp          | 0.271763904 | -1.879574245 | 0.016998824 |
| 296 | ENSMUSG00000024411 | Aqp4          | 0.328299555 | -1.606915301 | 0.017031076 |
| 297 | ENSMUSG00000037605 | Adgrl3        | 0.317644715 | -1.654514079 | 0.017406568 |
| 298 | ENSMUSG00000024391 | Apom          | 0.329347622 | -1.602316963 | 0.01747286  |
| 299 | ENSMUSG00000025937 | Lactb2        | 0.333161601 | -1.585705965 | 0.017825816 |
| 300 | ENSMUSG00000071633 | Gm4952        | 0.241654767 | -2.048980643 | 0.017985498 |
| 301 | ENSMUSG00000027762 | Sucnr1        | 0.328368141 | -1.606613933 | 0.018094028 |

|     |                    |               |             |              |             |
|-----|--------------------|---------------|-------------|--------------|-------------|
| 302 | ENSMUSG00000021999 | Cpb2          | 0.267860165 | -1.900448048 | 0.01821108  |
| 303 | ENSMUSG00000087135 | Gm16096       | 0.146484748 | -2.771177635 | 0.018258403 |
| 304 | ENSMUSG00000109089 | 4833411C07Rik | 0.146484748 | -2.771177635 | 0.018258403 |
| 305 | ENSMUSG00000020777 | Acox1         | 0.334947719 | -1.577992169 | 0.018341017 |
| 306 | ENSMUSG00000112478 | AC153370.2    | 0.28805203  | -1.795598668 | 0.018372932 |
| 307 | ENSMUSG00000027513 | Pck1          | 0.335839871 | -1.574154578 | 0.018581102 |
| 308 | ENSMUSG00000099876 | Gm29650       | 0.204042751 | -2.293056639 | 0.019112419 |
| 309 | ENSMUSG00000078487 | Ankrd65       | 0.204042751 | -2.293056639 | 0.019112419 |
| 310 | ENSMUSG00000061577 | Adgrg5        | 0.204042751 | -2.293056639 | 0.019112419 |
| 311 | ENSMUSG00000003949 | Hlf           | 0.33638783  | -1.571802583 | 0.019158619 |
| 312 | ENSMUSG00000047728 | BC025446      | 0.334875032 | -1.578305281 | 0.019239285 |
| 313 | ENSMUSG00000104208 | Gm37401       | 0.214625413 | -2.220107187 | 0.019614958 |
| 314 | ENSMUSG00000066366 | Serpina1a     | 0.338837246 | -1.561335626 | 0.019633497 |
| 315 | ENSMUSG00000023073 | Slc10a2       | 0.335362003 | -1.576208858 | 0.019746701 |
| 316 | ENSMUSG00000086600 | C030005K06Rik | 0.279373646 | -1.839732163 | 0.019867521 |
| 317 | ENSMUSG00000087616 | Gm14257       | 0.227012339 | -2.13915738  | 0.01990983  |
| 318 | ENSMUSG00000072949 | Acot1         | 0.339016561 | -1.560572344 | 0.020103144 |
| 319 | ENSMUSG00000037542 | Aldh8a1       | 0.340457886 | -1.554451744 | 0.020204897 |
| 320 | ENSMUSG00000040134 | Rdh7          | 0.246310345 | -2.021450871 | 0.020206433 |
| 321 | ENSMUSG00000020681 | Ace           | 0.340424582 | -1.554592878 | 0.020348288 |
| 322 | ENSMUSG00000020258 | Glyctk        | 0.341118278 | -1.551656034 | 0.020567161 |
| 323 | ENSMUSG00000001095 | Slc13a2       | 0.341566587 | -1.54976124  | 0.021149024 |
| 324 | ENSMUSG00000075304 | Sp5           | 0.338035509 | -1.564753291 | 0.021361041 |
| 325 | ENSMUSG00000022040 | Ephx2         | 0.344612372 | -1.536953597 | 0.021489006 |
| 326 | ENSMUSG00000109644 | 0610005C13Rik | 0.344165806 | -1.538824325 | 0.021501214 |
| 327 | ENSMUSG00000100774 | Gm7329        | 0.015456825 | -6.015612189 | 0.021900161 |
| 328 | ENSMUSG00000027967 | Neurog2       | 0.015608981 | -6.001479874 | 0.021900161 |
| 329 | ENSMUSG00000048349 | Pou4f1        | 0.015608981 | -6.001479874 | 0.021900161 |
| 330 | ENSMUSG00000085658 | Gm15704       | 0.015608981 | -6.001479874 | 0.021900161 |
| 331 | ENSMUSG00000086837 | Gm16618       | 0.015608981 | -6.001479874 | 0.021900161 |
| 332 | ENSMUSG00000104384 | Gm37031       | 0.015608981 | -6.001479874 | 0.021900161 |
| 333 | ENSMUSG00000106438 | Gm42749       | 0.015608981 | -6.001479874 | 0.021900161 |
| 334 | ENSMUSG00000113848 | CT572985.3    | 0.015608981 | -6.001479874 | 0.021900161 |
| 335 | ENSMUSG00000105747 | Igkv13-64     | 0.015764162 | -5.987207751 | 0.021900161 |
| 336 | ENSMUSG00000099764 | Rps10-ps2     | 0.015831616 | -5.981047639 | 0.021900161 |
| 337 | ENSMUSG00000108521 | Gm44639       | 0.015608981 | -6.001479874 | 0.021900161 |
| 338 | ENSMUSG00000105852 | Gm42890       | 0.01408393  | -6.14980621  | 0.021900161 |
| 339 | ENSMUSG00000095852 | Gm10256       | 0.014450652 | -6.112721637 | 0.021900161 |
| 340 | ENSMUSG00000096947 | Gm26723       | 0.015140562 | -6.045437451 | 0.021900161 |
| 341 | ENSMUSG00000097530 | Kansl2-ps     | 0.015202775 | -6.039521522 | 0.021900161 |
| 342 | ENSMUSG00000021263 | Degs2         | 0.343264992 | -1.542605362 | 0.02204131  |
| 343 | ENSMUSG00000067656 | Slc22a27      | 0.17140284  | -2.544537081 | 0.022208097 |
| 344 | ENSMUSG00000059481 | Plg           | 0.121040247 | -3.046441262 | 0.022208097 |
| 345 | ENSMUSG00000028179 | Cth           | 0.346319372 | -1.529825006 | 0.022252779 |
| 346 | ENSMUSG00000056487 | Mettl7a2      | 0.347857408 | -1.523432051 | 0.022673774 |
| 347 | ENSMUSG00000079501 | Gm5138        | 0.30549956  | -1.71075779  | 0.022755702 |
| 348 | ENSMUSG00000086929 | Gm11788       | 0.252976554 | -1.982924411 | 0.022886106 |
| 349 | ENSMUSG00000003623 | Crot          | 0.348340388 | -1.521430341 | 0.022938813 |
| 350 | ENSMUSG00000097613 | Gm17597       | 0.252125795 | -1.987784364 | 0.023091217 |

|     |                    |               |             |              |             |
|-----|--------------------|---------------|-------------|--------------|-------------|
| 351 | ENSMUSG00000110540 | Gm45743       | 0.290470444 | -1.783536723 | 0.023144746 |
| 352 | ENSMUSG00000029245 | Epha5         | 0.308580757 | -1.696279995 | 0.023179116 |
| 353 | ENSMUSG00000022235 | Cmb1          | 0.349031617 | -1.518570365 | 0.023197684 |
| 354 | ENSMUSG00000058385 | Hist1h2bg     | 0.171729715 | -2.541788403 | 0.023239034 |
| 355 | ENSMUSG00000085192 | Gm12195       | 0.242353621 | -2.044814456 | 0.023294179 |
| 356 | ENSMUSG00000062170 | Fmr1nb        | 0.214719471 | -2.219475072 | 0.023630413 |
| 357 | ENSMUSG00000043719 | Col6a6        | 0.214719471 | -2.219475072 | 0.023630413 |
| 358 | ENSMUSG00000046806 | 3110062M04Rik | 0.338407783 | -1.563165345 | 0.02368038  |
| 359 | ENSMUSG00000109311 | Al314278      | 0.350288647 | -1.513383866 | 0.023738216 |
| 360 | ENSMUSG00000063683 | Glyat         | 0.351492183 | -1.508435489 | 0.02394066  |
| 361 | ENSMUSG00000100750 | Gm29084       | 0.347454787 | -1.525102839 | 0.02404112  |
| 362 | ENSMUSG00000047719 | Ubiad1        | 0.350584862 | -1.512164393 | 0.024266284 |
| 363 | ENSMUSG00000068086 | Cyp2d9        | 0.352319282 | -1.505044662 | 0.024287858 |
| 364 | ENSMUSG00000006345 | Ggt1          | 0.352801588 | -1.50307104  | 0.024354364 |
| 365 | ENSMUSG00000019894 | Slc6a15       | 0.335340985 | -1.576299276 | 0.024403328 |
| 366 | ENSMUSG00000000673 | Haa0          | 0.352787197 | -1.503129889 | 0.024532066 |
| 367 | ENSMUSG00000069456 | Rdh16         | 0.352910002 | -1.502627775 | 0.024644253 |
| 368 | ENSMUSG00000095388 | Gm10681       | 0.354377093 | -1.496642745 | 0.025009696 |
| 369 | ENSMUSG00000027605 | Acss2         | 0.354901424 | -1.494509731 | 0.025283156 |
| 370 | ENSMUSG00000042410 | Agps          | 0.354821855 | -1.494833222 | 0.025461643 |
| 371 | ENSMUSG00000030498 | Gas2          | 0.355084266 | -1.493766659 | 0.02551142  |
| 372 | ENSMUSG00000028088 | Fmo5          | 0.354722813 | -1.495235978 | 0.025561748 |
| 373 | ENSMUSG00000108178 | Gm44267       | 0.314802101 | -1.667482926 | 0.02579325  |
| 374 | ENSMUSG00000002944 | Cd36          | 0.356009108 | -1.490013942 | 0.025866101 |
| 375 | ENSMUSG00000064373 | Selenop       | 0.357457483 | -1.484156443 | 0.026109132 |
| 376 | ENSMUSG00000059602 | Syn3          | 0.356881322 | -1.486483697 | 0.026240243 |
| 377 | ENSMUSG00000055373 | Fut9          | 0.356815787 | -1.486748649 | 0.026337411 |
| 378 | ENSMUSG00000101514 | Gm5524        | 0.287783357 | -1.796944932 | 0.026515485 |
| 379 | ENSMUSG00000089678 | Agxt2         | 0.35697039  | -1.486123685 | 0.026586685 |
| 380 | ENSMUSG00000011008 | Mcoln2        | 0.312573481 | -1.677732712 | 0.026673066 |
| 381 | ENSMUSG00000030972 | Acsm5         | 0.357145153 | -1.485417553 | 0.026802757 |
| 382 | ENSMUSG00000087341 | 0610040F04Rik | 0.347809604 | -1.523630323 | 0.026926478 |
| 383 | ENSMUSG00000046082 | Tmem174       | 0.359565262 | -1.475674447 | 0.027011339 |
| 384 | ENSMUSG00000049799 | Lrrc19        | 0.357994447 | -1.481990887 | 0.027116838 |
| 385 | ENSMUSG00000103711 | Tstd1         | 0.351826553 | -1.507063724 | 0.02729907  |
| 386 | ENSMUSG00000027870 | Hao2          | 0.36044996  | -1.472129108 | 0.027396719 |
| 387 | ENSMUSG00000109904 | Gm45819       | 0.294045853 | -1.765886953 | 0.027504091 |
| 388 | ENSMUSG00000027965 | Olfm3         | 0.331578919 | -1.592575807 | 0.027505846 |
| 389 | ENSMUSG00000107504 | Gm35549       | 0.248899254 | -2.006366187 | 0.027518336 |
| 390 | ENSMUSG00000022218 | Tgm1          | 0.355891699 | -1.49048981  | 0.027678686 |
| 391 | ENSMUSG00000089694 | Nat8f7        | 0.344724185 | -1.536485577 | 0.027761081 |
| 392 | ENSMUSG00000038072 | Galnt11       | 0.361691776 | -1.467167299 | 0.027901672 |
| 393 | ENSMUSG00000039438 | Ttc36         | 0.361900487 | -1.466335046 | 0.027909516 |
| 394 | ENSMUSG00000102234 | Gm37885       | 0.156044349 | -2.679971982 | 0.027969425 |
| 395 | ENSMUSG00000003476 | Crhr2         | 0.08995127  | -3.47471254  | 0.027969425 |
| 396 | ENSMUSG00000076589 | Igkv8-18      | 0.246657736 | -2.01941756  | 0.028123146 |
| 397 | ENSMUSG00000061578 | Ksr2          | 0.349228518 | -1.517756721 | 0.028699664 |
| 398 | ENSMUSG00000112734 | AC153524.4    | 0.21967497  | -2.186557597 | 0.028743676 |
| 399 | ENSMUSG00000068587 | Mgam          | 0.360772615 | -1.470838262 | 0.028795684 |



|     |                     |               |             |              |             |
|-----|---------------------|---------------|-------------|--------------|-------------|
| 400 | ENSMUSG00000042797  | Aqp11         | 0.3628054   | -1.462732167 | 0.029200189 |
| 401 | ENSMUSG00000077640  | Gm24986       | 0.226575223 | -2.141937989 | 0.029323086 |
| 402 | ENSMUSG00000086279  | Gm15634       | 0.226575223 | -2.141937989 | 0.029323086 |
| 403 | ENSMUSG00000033427  | Upb1          | 0.364618131 | -1.455541793 | 0.029336546 |
| 404 | ENSMUSG00000097481  | D330020A13Rik | 0.130272211 | -2.940398723 | 0.029588432 |
| 405 | ENSMUSG00000076434  | Wfdc3         | 0.130272211 | -2.940398723 | 0.029588432 |
| 406 | ENSMUSG00000031258  | Xkrr          | 0.130272211 | -2.940398723 | 0.029588432 |
| 407 | ENSMUSG00000026940  | Ccdc183       | 0.218714999 | -2.192875937 | 0.029721761 |
| 408 | ENSMUSG00000080893  | Gm15920       | 0.16724729  | -2.579945264 | 0.029721761 |
| 409 | ENSMUSG00000085885  | Gm11906       | 0.165872584 | -2.591852644 | 0.029721761 |
| 410 | ENSMUSG00000024386  | Proc          | 0.3661896   | -1.449337276 | 0.029891203 |
| 411 | ENSMUSG00000025726  | Slc28a1       | 0.358388427 | -1.480404045 | 0.03033443  |
| 412 | ENSMUSG00000036466  | Megf11        | 0.320657326 | -1.640895724 | 0.030442387 |
| 413 | ENSMUSG00000025089  | Gfra1         | 0.344954581 | -1.535521676 | 0.030663896 |
| 414 | ENSMUSG00000055737  | Ghr           | 0.369061896 | -1.4380653   | 0.031035054 |
| 415 | ENSMUSG00000097239  | Gm27029       | 0.318376589 | -1.651193839 | 0.031061299 |
| 416 | ENSMUSG00000060314  | Zfp941        | 0.259596242 | -1.945658595 | 0.031232938 |
| 417 | ENSMUSG00000001755  | Coasy         | 0.369283763 | -1.437198265 | 0.031285749 |
| 418 | ENSMUSG00000003809  | Gedh          | 0.369745672 | -1.435394834 | 0.031321112 |
| 419 | ENSMUSG00000023120  | Gm853         | 0.365420638 | -1.452369978 | 0.031533743 |
| 420 | ENSMUSG00000057766  | Ankrd29       | 0.356121789 | -1.489557388 | 0.031600948 |
| 421 | ENSMUSG00000076441  | Ass1          | 0.370701489 | -1.431670184 | 0.031629457 |
| 422 | ENSMUSG00000039682  | Lap3          | 0.370456378 | -1.432624423 | 0.031660094 |
| 423 | ENSMUSG000000107451 | Gm44421       | 0.346621661 | -1.528566282 | 0.031812997 |
| 424 | ENSMUSG00000074398  | Gm15441       | 0.352354592 | -1.504900077 | 0.031886188 |
| 425 | ENSMUSG00000021376  | Tpmt          | 0.370319722 | -1.433156712 | 0.031995405 |
| 426 | ENSMUSG00000087142  | Gm12454       | 0.303374389 | -1.720828797 | 0.032082603 |
| 427 | ENSMUSG00000002475  | Abhd3         | 0.369700651 | -1.435570511 | 0.032337322 |
| 428 | ENSMUSG00000096499  | Ighv1-5       | 0.298809948 | -1.742699914 | 0.032386763 |
| 429 | ENSMUSG00000043789  | Vwce          | 0.362948597 | -1.462162855 | 0.032880082 |
| 430 | ENSMUSG00000024646  | Cyb5a         | 0.373897299 | -1.419286045 | 0.033106705 |
| 431 | ENSMUSG00000035472  | Slc25a21      | 0.363842556 | -1.458613802 | 0.033125648 |
| 432 | ENSMUSG00000030268  | Beat1         | 0.370153966 | -1.433802609 | 0.033252628 |
| 433 | ENSMUSG00000038528  | Mfsd4b5       | 0.374048708 | -1.418701946 | 0.033300346 |
| 434 | ENSMUSG00000025243  | Slc6a20b      | 0.373972049 | -1.41899765  | 0.033353704 |
| 435 | ENSMUSG00000028189  | Ctbs          | 0.371060576 | -1.430273366 | 0.033865424 |
| 436 | ENSMUSG00000027597  | Ahey          | 0.376182028 | -1.410497169 | 0.034222986 |
| 437 | ENSMUSG00000096795  | Zfp433        | 0.312190444 | -1.679501717 | 0.034271036 |
| 438 | ENSMUSG00000033963  | Fancd2os      | 0.307105634 | -1.703193114 | 0.034271036 |
| 439 | ENSMUSG00000031303  | Map3k15       | 0.369625706 | -1.435863001 | 0.034574787 |
| 440 | ENSMUSG00000029650  | Slc46a3       | 0.371871678 | -1.42712322  | 0.034661111 |
| 441 | ENSMUSG00000053603  | 4930442H23Rik | 0.017205932 | -5.860950139 | 0.034782609 |
| 442 | ENSMUSG00000080888  | Gm14387       | 0.017476849 | -5.838411076 | 0.034782609 |
| 443 | ENSMUSG000000111685 | AC124577.4    | 0.01753206  | -5.833860698 | 0.034782609 |
| 444 | ENSMUSG000000109982 | Gm45520       | 0.018133552 | -5.785194634 | 0.034782609 |
| 445 | ENSMUSG00000012042  | 4930579F01Rik | 0.018163226 | -5.782835746 | 0.034782609 |
| 446 | ENSMUSG00000039059  | Hrh3          | 0.018163226 | -5.782835746 | 0.034782609 |
| 447 | ENSMUSG000000114133 | AC153134.1    | 0.018282898 | -5.773361431 | 0.034782609 |
| 448 | ENSMUSG00000047641  | Krt87         | 0.018163226 | -5.782835746 | 0.034782609 |

|     |                    |               |             |              |             |
|-----|--------------------|---------------|-------------|--------------|-------------|
| 449 | ENSMUSG00000055170 | Ifng          | 0.018163226 | -5.782835746 | 0.034782609 |
| 450 | ENSMUSG00000072618 | Gm10384       | 0.018163226 | -5.782835746 | 0.034782609 |
| 451 | ENSMUSG00000085925 | Rtl1          | 0.018163226 | -5.782835746 | 0.034782609 |
| 452 | ENSMUSG00000085196 | Gm14963       | 0.018163226 | -5.782835746 | 0.034782609 |
| 453 | ENSMUSG00000087017 | 4930417H01Rik | 0.018163226 | -5.782835746 | 0.034782609 |
| 454 | ENSMUSG00000086387 | Gm15563       | 0.018163226 | -5.782835746 | 0.034782609 |
| 455 | ENSMUSG00000111082 | AC061963.3    | 0.018163226 | -5.782835746 | 0.034782609 |
| 456 | ENSMUSG00000040489 | Sox30         | 0.018163226 | -5.782835746 | 0.034782609 |
| 457 | ENSMUSG00000113386 | AC154903.1    | 0.016465727 | -5.924389992 | 0.034782609 |
| 458 | ENSMUSG00000081738 | Hmgb1-ps2     | 0.016688538 | -5.904998624 | 0.034782609 |
| 459 | ENSMUSG00000086801 | Gm15943       | 0.016840459 | -5.891924714 | 0.034782609 |
| 460 | ENSMUSG00000061390 | Gm7866        | 0.016738873 | -5.900653805 | 0.034782609 |
| 461 | ENSMUSG00000052595 | Alcf          | 0.372970734 | -1.422865663 | 0.034817911 |
| 462 | ENSMUSG00000046352 | Gjb2          | 0.376137323 | -1.410668628 | 0.034925108 |
| 463 | ENSMUSG00000019787 | Trdn          | 0.243747473 | -2.036540832 | 0.034945041 |
| 464 | ENSMUSG00000056148 | Rdh9          | 0.297720657 | -1.747968769 | 0.035193135 |
| 465 | ENSMUSG00000027070 | Lrp2          | 0.378292574 | -1.402425637 | 0.035194509 |
| 466 | ENSMUSG00000056600 | Olfr90        | 0.319848914 | -1.644537512 | 0.035334578 |
| 467 | ENSMUSG00000024899 | Papss2        | 0.37929206  | -1.398618925 | 0.035787733 |
| 468 | ENSMUSG00000015083 | C8g           | 0.372915119 | -1.423080807 | 0.035884909 |
| 469 | ENSMUSG00000020051 | Pah           | 0.379711543 | -1.397024239 | 0.035894758 |
| 470 | ENSMUSG00000094930 | Igkv6-25      | 0.36820986  | -1.441399833 | 0.035921808 |
| 471 | ENSMUSG00000033965 | Slc16a2       | 0.379331408 | -1.398469265 | 0.035984243 |
| 472 | ENSMUSG00000022002 | Erich6b       | 0.269171554 | -1.893402139 | 0.036252813 |
| 473 | ENSMUSG00000102425 | Gm26616       | 0.274907722 | -1.86298066  | 0.036252813 |
| 474 | ENSMUSG00000032047 | Acat1         | 0.380634816 | -1.393520568 | 0.036354778 |
| 475 | ENSMUSG00000035780 | Ugt2a3        | 0.239816722 | -2.059995837 | 0.036520717 |
| 476 | ENSMUSG00000055555 | 4930502E18Rik | 0.239816722 | -2.059995837 | 0.036520717 |
| 477 | ENSMUSG00000042116 | Vwa1          | 0.378699384 | -1.400875021 | 0.036604695 |
| 478 | ENSMUSG00000000154 | Slc22a18      | 0.381314075 | -1.390948309 | 0.036675448 |
| 479 | ENSMUSG00000058258 | Idi1          | 0.379378776 | -1.398289125 | 0.037071807 |
| 480 | ENSMUSG00000019874 | Fabp7         | 0.356141017 | -1.489479495 | 0.03715679  |
| 481 | ENSMUSG00000023921 | Mut           | 0.381716    | -1.389428436 | 0.037549213 |
| 482 | ENSMUSG00000024424 | Ttc39c        | 0.379482872 | -1.397893324 | 0.037592387 |
| 483 | ENSMUSG00000053897 | Slc39a8       | 0.380483032 | -1.394095977 | 0.037641574 |
| 484 | ENSMUSG00000025903 | Lypla1        | 0.38297849  | -1.384664729 | 0.037823966 |
| 485 | ENSMUSG00000085787 | Gm13092       | 0.316539194 | -1.659543949 | 0.037881243 |
| 486 | ENSMUSG00000095143 | Hsd3b4        | 0.383295888 | -1.383469573 | 0.037881535 |
| 487 | ENSMUSG00000026687 | Aldh9a1       | 0.383677552 | -1.382033734 | 0.037892455 |
| 488 | ENSMUSG00000081143 | Gm15823       | 0.359056509 | -1.477717178 | 0.038153194 |
| 489 | ENSMUSG00000036330 | Slc18a1       | 0.382786009 | -1.385389994 | 0.038194157 |
| 490 | ENSMUSG00000041058 | Wwp1          | 0.382904072 | -1.384945094 | 0.038231714 |
| 491 | ENSMUSG00000030630 | Fah           | 0.386019402 | -1.373254734 | 0.039077098 |
| 492 | ENSMUSG00000026156 | B3gat2        | 0.384827458 | -1.377716355 | 0.039133704 |
| 493 | ENSMUSG00000054986 | Sec14l3       | 0.335260313 | -1.576646382 | 0.039155241 |
| 494 | ENSMUSG00000069733 | Ube2u         | 0.360561938 | -1.471680985 | 0.039597587 |
| 495 | ENSMUSG00000108207 | 1810059H22Rik | 0.381157603 | -1.39154044  | 0.039692978 |
| 496 | ENSMUSG00000097564 | C430014B12Rik | 0.171782952 | -2.54134123  | 0.039696281 |
| 497 | ENSMUSG00000070574 | 2310016G11Rik | 0.317651371 | -1.65448385  | 0.039747057 |

|     |                     |               |             |              |             |
|-----|---------------------|---------------|-------------|--------------|-------------|
| 498 | ENSMUSG00000090817  | Gm4450        | 0.386971781 | -1.36969973  | 0.03981969  |
| 499 | ENSMUSG00000038526  | Car14         | 0.386831165 | -1.370224063 | 0.039891151 |
| 500 | ENSMUSG00000086350  | B230369F24Rik | 0.278108328 | -1.846281147 | 0.03995467  |
| 501 | ENSMUSG00000053825  | Ppfia2        | 0.306258997 | -1.707175867 | 0.03995467  |
| 502 | ENSMUSG00000039809  | Gabbr2        | 0.099824096 | -3.324468092 | 0.039970491 |
| 503 | ENSMUSG000000103925 | B230112G18Rik | 0.099824096 | -3.324468092 | 0.039970491 |
| 504 | ENSMUSG00000081833  | Gm13669       | 0.099824096 | -3.324468092 | 0.039970491 |
| 505 | ENSMUSG00000087077  | Gm12480       | 0.076160885 | -3.714805942 | 0.039970491 |
| 506 | ENSMUSG000000105961 | Gm42754       | 0.253781726 | -1.978339907 | 0.040093587 |
| 507 | ENSMUSG00000031698  | Mylk3         | 0.257813169 | -1.955602136 | 0.040093587 |
| 508 | ENSMUSG00000021490  | Slc34a1       | 0.388635746 | -1.363509491 | 0.040328754 |
| 509 | ENSMUSG000000108884 | Gm45792       | 0.361534953 | -1.467792963 | 0.040431312 |
| 510 | ENSMUSG00000079263  | Gm6614        | 0.321402898 | -1.637545157 | 0.040452122 |
| 511 | ENSMUSG00000024292  | Cyp4f14       | 0.341612076 | -1.549569121 | 0.040716268 |
| 512 | ENSMUSG00000047638  | Nr1h4         | 0.388611781 | -1.363598457 | 0.040900133 |
| 513 | ENSMUSG00000029273  | Sult1d1       | 0.389447149 | -1.360500537 | 0.040936778 |
| 514 | ENSMUSG00000074071  | Fam169b       | 0.377710863 | -1.404645818 | 0.040989146 |
| 515 | ENSMUSG00000042251  | Pm20d1        | 0.388783028 | -1.362962855 | 0.041098962 |
| 516 | ENSMUSG000000104520 | Gm37336       | 0.316858934 | -1.658087399 | 0.04127558  |
| 517 | ENSMUSG00000028755  | Cda           | 0.391726171 | -1.352082576 | 0.0422133   |
| 518 | ENSMUSG00000058022  | Adtrp         | 0.391296644 | -1.353665359 | 0.042313835 |
| 519 | ENSMUSG00000037754  | Ppp1r16b      | 0.390793217 | -1.355522669 | 0.042403839 |
| 520 | ENSMUSG00000024064  | Galnt14       | 0.390052897 | -1.358258307 | 0.042590464 |
| 521 | ENSMUSG00000024228  | Nudt12        | 0.387192205 | -1.368878186 | 0.042600732 |
| 522 | ENSMUSG00000033544  | Angptl1       | 0.256501779 | -1.962959265 | 0.042605988 |
| 523 | ENSMUSG00000091002  | Tcerg1l       | 0.256501779 | -1.962959265 | 0.042605988 |
| 524 | ENSMUSG00000064354  | mt-Co2        | 0.393650594 | -1.345012438 | 0.043187508 |
| 525 | ENSMUSG00000035031  | C8a           | 0.381088003 | -1.391803904 | 0.043255475 |
| 526 | ENSMUSG000000110755 | AC151971.2    | 0.375369931 | -1.413615009 | 0.043410577 |
| 527 | ENSMUSG00000025082  | Vwa2          | 0.386217327 | -1.372515205 | 0.043618028 |
| 528 | ENSMUSG00000015599  | Ttbf1         | 0.364372476 | -1.456514109 | 0.043676496 |
| 529 | ENSMUSG00000036813  | Entpd8        | 0.377891922 | -1.403954417 | 0.043685209 |
| 530 | ENSMUSG00000097204  | Gm17690       | 0.357712942 | -1.483125779 | 0.044176692 |
| 531 | ENSMUSG00000024892  | Pcx           | 0.396249476 | -1.335519067 | 0.044592527 |
| 532 | ENSMUSG00000099098  | 1110035H17Rik | 0.286979219 | -1.800981822 | 0.0447917   |
| 533 | ENSMUSG00000081684  | Rps2-ps13     | 0.291513418 | -1.778365805 | 0.0447917   |
| 534 | ENSMUSG00000060002  | Chpt1         | 0.397296933 | -1.33171044  | 0.045122397 |
| 535 | ENSMUSG00000079261  | Gm15217       | 0.389948517 | -1.35864443  | 0.045341403 |
| 536 | ENSMUSG00000002346  | Slc25a42      | 0.396095852 | -1.336078501 | 0.045409408 |
| 537 | ENSMUSG00000002797  | Ggct          | 0.394291495 | -1.342665505 | 0.045638163 |
| 538 | ENSMUSG00000076666  | Ighv14-4      | 0.254702005 | -1.97311778  | 0.045651874 |
| 539 | ENSMUSG00000078808  | Vmn1r58       | 0.246886707 | -2.018078933 | 0.045651874 |
| 540 | ENSMUSG00000028712  | Cyp4a31       | 0.398137614 | -1.32866092  | 0.045721322 |
| 541 | ENSMUSG00000024354  | Slc23a1       | 0.398239426 | -1.328292039 | 0.046053993 |
| 542 | ENSMUSG00000021033  | Gstz1         | 0.399117913 | -1.325113066 | 0.04630905  |
| 543 | ENSMUSG00000017453  | Pipox         | 0.399445506 | -1.323929397 | 0.046461883 |
| 544 | ENSMUSG00000086914  | Gm16124       | 0.326726549 | -1.613844404 | 0.046667979 |
| 545 | ENSMUSG00000031938  | 4931406C07Rik | 0.400359774 | -1.320631067 | 0.046904708 |
| 546 | ENSMUSG00000021238  | Aldh6a1       | 0.401394569 | -1.316906997 | 0.047574261 |

|     |                    |            |             |              |             |
|-----|--------------------|------------|-------------|--------------|-------------|
| 547 | ENSMUSG00000026730 | Pter       | 0.401519557 | -1.316457835 | 0.047671951 |
| 548 | ENSMUSG00000076536 | Igkv4-86   | 0.270025439 | -1.888832766 | 0.048036813 |
| 549 | ENSMUSG00000095442 | Ighv1-4    | 0.270025439 | -1.888832766 | 0.048036813 |
| 550 | ENSMUSG00000020623 | Map2k6     | 0.3966866   | -1.333928431 | 0.048322593 |
| 551 | ENSMUSG00000027187 | Cat        | 0.402905334 | -1.311487189 | 0.048351135 |
| 552 | ENSMUSG00000019232 | Etnppl     | 0.396860032 | -1.33329782  | 0.048874699 |
| 553 | ENSMUSG00000109478 | Gm45111    | 0.379986757 | -1.395978956 | 0.048894102 |
| 554 | ENSMUSG00000084111 | Gm15710    | 0.187131963 | -2.417872096 | 0.049335813 |
| 555 | ENSMUSG00000096954 | Gdap10     | 0.234214614 | -2.094096999 | 0.049335813 |
| 556 | ENSMUSG00000113581 | AL591207.3 | 0.354609435 | -1.495697174 | 0.049337786 |
| 557 | ENSMUSG00000028655 | Mfsd2a     | 0.382141001 | -1.387823038 | 0.049703029 |
| 558 | ENSMUSG00000048281 | Dleu7      | 0.396101099 | -1.33605939  | 0.049900991 |

---
