# Supplementary material
Source: publisher figshare collection journal article supplement (https://diabetesjournals.figshare.com/articles/dataset/_/14226179)
Supplement: Supplementary file 4 [file 1]

**Supplementary Table S2. List of primers.**

| Primers                       |         |                         |
|-------------------------------|---------|-------------------------|
| <b>mGPDH</b>                  | Forward | TTTCTTCTTGCCTTGGGAGA    |
|                               | Reverse | AGTTCCGCACTTCATTTCAGG   |
| <b>Fn</b>                     | Forward | ATGCCTCGGGAATGGAAAGG    |
|                               | Reverse | TCTAGCGGCATGAAGCACTC    |
| <b>GAPDH</b>                  | Forward | TGAACGGGAAGCTCACTG      |
|                               | Reverse | TCCACCACCCTGTTGCTG      |
| <b>Col1</b>                   | Forward | GGAGAGAGCATGACCGATGG    |
|                               | Reverse | GGTAGGGAAGTAGACGGGGT    |
| <b>Col4</b>                   | Forward | GGCAGGTCAAGTTCTAGCGT    |
|                               | Reverse | GGTATGCAGCAAAGCTTACAGG  |
| <b><math>\alpha</math>SMA</b> | Forward | GTCCCAGACATCAGGGAGTAA   |
|                               | Reverse | TCGGATACTTCAGCGTCAGGA   |
| <b>RAGE</b>                   | Forward | TATGGGGAGCTGTAGCTGGT    |
|                               | Reverse | GATGGGTTCCCTCCTTGGGTG   |
| <b>p65</b>                    | Forward | CCTGGTCACCAAGGATCCAC    |
|                               | Reverse | CATAGTAGCCATCCCGGCAG    |
| <b>CCL2</b>                   | Forward | ACAAGAGGATCACCAGCAGC    |
|                               | Reverse | GGACCCATTCTTCTTGGGG     |
| <b>IL-1<math>\beta</math></b> | Forward | GCAACTGTTCTGAACTCAACT   |
|                               | Reverse | ATCTTTTGGGGTCCGTCAACT   |
| <b>IL-6</b>                   | Forward | TAGTCCTTCCTACCCCAATTTCC |
|                               | Reverse | TTGGTCCTTAGCCACTCCTTC   |
| <b>TNF<math>\alpha</math></b> | Forward | GACGTGGAAGTGGCAGAAGAG   |
|                               | Reverse | TTGGTGGTTTGTGAGTGTGAG   |
| <b>FOXO4</b>                  | Forward | TGCAGAAAGTGCCTTCGCTA    |
|                               | Reverse | CGTAGATCTGGGCGAGTGTC    |
| <b>TGF<math>\beta</math></b>  | Forward | CTCTTGAGTCCCTCGCATCC    |
|                               | Reverse | GTCTTGCAGGTGGAGAGTCC    |
| <b>CTGF</b>                   | Forward | CTGCTGTGCATCCTCCTACC    |
|                               | Reverse | TTCATGATCTCGCCATCGGG    |
| <b>S100A10</b>                | Forward | GGTTTGCAGGCGACAAAGAC    |
|                               | Reverse | GGGCAATGGGATGCAAACAA    |

|                                 |         |                         |
|---------------------------------|---------|-------------------------|
| <b>Cox2</b>                     | Forward | ATAACCGAGTCGTTCTGCCAAT  |
|                                 | Reverse | TTTCAGAGCATTGGCCATAGAA  |
| <b>Rps18</b>                    | Forward | TGTGTTAGGGGACTGGTGGACA  |
|                                 | Reverse | CATCACCCACTTACCCCCAAAA  |
| <b>PGC-1<math>\alpha</math></b> | Forward | TCTCAGTAAGGGGCTGGTTG    |
|                                 | Reverse | TTCCGATTGGTCGCTACACC    |
| <b>SDHb</b>                     | Forward | ACCCCTTCTCTGTCTACCG     |
|                                 | Reverse | AATGCTCGCTTCTCCTTGTAG   |
| <b>Uqcrc1</b>                   | Forward | ATCAAGGCACTGTCCAAGG     |
|                                 | Reverse | TCATTTTCCTGCATCTCCCG    |
| <b>COX5b</b>                    | Forward | ACCCTAATCTAGTCCCGTCC    |
|                                 | Reverse | CAGCCAAAACCAGATGACAG    |
| <b>ATP5a1</b>                   | Forward | CATTGGTGATGGTATTGCGC    |
|                                 | Reverse | TCCCAAACACGACAACTCC     |
| <b>ND1</b>                      | Forward | CCCACCCCATATTAAACCCG    |
|                                 | Reverse | GAGGTATGAAGGAAAGGTATAAG |
| <b>Cytb</b>                     | Forward | CCCAGATATAGCATTCCCACG   |
|                                 | Reverse | ACTGTTCATCCTGTTCTGC     |
| <b>COX1</b>                     | Forward | CCCAGATATAGCATTCCCACG   |
|                                 | Reverse | ACTGTTCATCCTGTTCTGC     |
| <b>ATP6</b>                     | Forward | TCCAATCGTTGTAGCCATC     |
|                                 | Reverse | TGTTGGAAAGAATGGAGTCGG   |
| <b>Nphs2</b>                    | Forward | GCGCTGCTGCTCCAG         |
|                                 | Reverse | CGGTTATTCAACTTGCACCA    |
| <b>mGPDH-Loxp</b>               | Forward | TTGTGGTTGTGGCACTGTGATAC |
|                                 | Reverse | GCAACATAACTCATCAACAGCCC |
