# Supplementary material
Source: publisher figshare collection journal article supplement (https://diabetesjournals.figshare.com/articles/dataset/_/14226179)
Supplement: Supplementary file 6 [file 1]

**Supplementary Table S4. Top 10 terms of KEGG analysis for differentially expressed genes in glomeruli from diabetic mGPDH KO mice compared with WT mice.**

**Down-regulated pathway:**

| ID       | Term                                       | Ratio_in_study | Ratio_in_pop | P value_corrected |
|----------|--------------------------------------------|----------------|--------------|-------------------|
| map00071 | Fatty acid degradation                     | 20/621         | 67/24050     | 3.81E-09          |
| map04146 | Peroxisome                                 | 32/621         | 116/24050    | 4.34E-09          |
| map00380 | Tryptophan metabolism                      | 15/621         | 59/24050     | 4.49E-09          |
| map00280 | Valine, leucine and isoleucine degradation | 21/621         | 67/24050     | 4.57E-09          |
| map00410 | beta-Alanine metabolism                    | 15/621         | 51/24050     | 5.34E-09          |
| map00650 | Butanoate metabolism                       | 14/621         | 34/24050     | 5.48E-09          |
| map03320 | PPAR signaling pathway                     | 22/621         | 130/24050    | 5.6E-09           |
| map00830 | Retinol metabolism                         | 20/621         | 144/24050    | 4.13E-08          |
| map00983 | Drug metabolism - other enzymes            | 21/621         | 178/24050    | 2.44E-07          |
| map00140 | Steroid hormone biosynthesis               | 19/621         | 145/24050    | 2.48E-07          |

**Up-regulated pathway:**

| ID       | Term                                                 | Ratio_in_study | Ratio_in_pop | P value_corrected |
|----------|------------------------------------------------------|----------------|--------------|-------------------|
| map04933 | AGE-RAGE signaling pathway in diabetic complications | 52/2665        | 138/24050    | <0.001            |
| map04668 | TNF signaling pathway                                | 56/2665        | 146/24050    | 1.80789E-11       |
| map05165 | Human papillomavirus infection                       | 126/2665       | 551/24050    | 1.15375E-09       |
| map04062 | Chemokine signaling pathway                          | 79/2665        | 257/24050    | 1.18971E-09       |
| map04926 | Relaxin signaling pathway                            | 53/2665        | 161/24050    | 1.2209E-09        |
| map05200 | Pathways in cancer                                   | 166/2665       | 851/24050    | 1.31326E-09       |
| map05145 | Toxoplasmosis                                        | 54/2665        | 186/24050    | 1.31872E-09       |
| map04512 | ECM-receptor interaction                             | 44/2665        | 99/24050     | 1.36314E-09       |
| map04060 | Cytokine-cytokine receptor interaction               | 95/2665        | 344/24050    | 1.36865E-09       |
| map04380 | Osteoclast differentiation                           | 67/2665        | 160/24050    | 1.39373E-09       |
